# Supplementary material for: Improving ocean bottom pressure fields using space gravity data in state estimation
Source: Copernicus journal article supplement (doi:10.5194/egusphere-2026-947), 2026-02-24
Supplement: Supplementary file [file egusphere-2026-947-AC2-supplement.pdf]

# Improving ocean bottom pressure fields using space gravity data in state estimation

Rui M. Ponte<sup>1</sup>, E. Nishchitha S. Silva<sup>1</sup>, Ou Wang<sup>2</sup>, Ichiro Fukumori<sup>2</sup>, and Mengnan Zhao<sup>1</sup>

<sup>1</sup>Atmospheric and Environmental Research, JANUS Research Group, LLC, Lexington, MA, USA

<sup>2</sup>Jet Propulsion Laboratory, California Institute of Technology, Pasadena, CA, USA

**Correspondence:** Rui M. Ponte (rponte@aer.com)

## Abstract.

Ocean bottom pressure ( $p_b$ ) is critical for monitoring and understanding ocean variability, yet global observations from GRACE and GRACE Follow-On suffer from limited spatiotemporal coverage. State estimation methods allow for the dynamical interpolation of sparse data by optimally combining observations with models. Here we examine the effects of assimilating GRACE data (local  $p_b$  anomalies and global mean), along with other datasets, on state estimates produced by the project for Estimating the Circulation and Climate of the Ocean (ECCO). The ECCO optimization leads to large adjustments in  $p_b$  fields at monthly and longer timescales. A substantial part of those adjustments is directly induced by GRACE constraints, with largest impacts occurring at high latitudes. Additionally, the mean ocean mass constraint is essential for mitigating large imbalances in freshwater fluxes derived from atmospheric reanalyses (used as prior forcing) and for producing a realistic barostatic sea level curve. Interpretation of remaining ECCO and GRACE differences highlights issues with non-oceanographic data signals. Our findings indicate that GRACE data contain information complementary to that available in other datasets, quantifying their value for determining  $p_b$  and associated circulation fields.

## 1 Introduction

Extensive knowledge and understanding of the ocean surface pressure field, as given by the difference between sea level and the geoid, has accumulated since the advent of high-quality satellite altimetry in the early 1990s (e.g., Stammer and Cazenave, 2017). Much less is known, however, about the ocean bottom pressure fields  $p_b$ . In contrast with the numerous altimeter missions flown since 1992, GRACE (Tapley et al., 2004) and GRACE Follow-On (Landerer et al., 2020), hereafter referred to simply as GRACE, are the only space-based missions delivering variable  $p_b$  fields on the global scale since 2002. Available *in situ*  $p_b$  measurements offer extremely limited spatial and temporal coverage and are also susceptible to long-term drift. The GRACE observations of  $p_b$  have been very useful to monitor and understand changes in sea level (e.g., WCRP Global Sea Level Budget Group, 2018), ocean heat content (e.g., Hakuba et al., 2024), ocean circulation (e.g., Landerer et al., 2015; Makowski et al., 2015), and other important climate-related issues. Nevertheless, their relatively coarse spatial resolution can be a limiting factor when trying, for example, to close regional sea level budgets (e.g., Ponte and Schindelegger, 2024) or measure changes in circulation involving narrow boundary currents (e.g., Landerer et al., 2015).

25 Models can provide dynamical interpolation of sparse data in both space and time. In particular, formal data assimilation methods allow for the optimal combination of observations and models to address some of the shortcomings of both. While altimeter data are routinely assimilated in most ocean analyses, relatively few efforts have used space-based  $p_b$  fields in a similar way. Early attempts by Köhl et al. (2012) used GRACE monthly data constraints for the period 2003–2007 to demonstrate their significant impact on  $p_b$  variability and related barotropic streamfunction and transports, particularly in subtropical gyres, near boundary currents, and also in polar latitudes. Their findings indicated that GRACE data can contain information not otherwise available in altimetry and hydrography data, in part because of the vastly different eddy “noise” affecting the various datasets. Saynisch et al. (2015) focused on daily GRACE data and a slightly longer period (2003–2009) and confirmed the substantial effects of  $p_b$  constraints in the high latitudes, primarily associated with induced changes in barotropic wind-driven dynamics. Their ensemble Kalman filter was also able to filter out the correlated data errors (“striping”) that plagued many of the early spherical harmonic GRACE data products (Swenson and Wahr, 2006).

Despite these early findings, most widely used ocean reanalyses still do not assimilate any GRACE data (Storto et al., 2024). A notable exception is the project for Estimating the Circulation and Climate of the Ocean (ECCO; Wunsch et al., 2009). In addition to using local  $p_b$  anomalies, ECCO also uses GRACE-based estimates of global ocean mean mass to constrain the net freshwater flux into the oceans and associated changes in barostatic sea level (Gregory et al., 2019). The latest publicly released ECCO solution (Fukumori et al., 2019) assimilates the whole GRACE record, along with many other ocean datasets. Such estimates provide an excellent opportunity to reexamine the value of space-based  $p_b$  data for improving our grasp of the global  $p_b$  fields, in the broader context of the variable ocean circulation.

In this study, we first determine the effects of the comprehensive ECCO optimization on the  $p_b$  fields by comparing a recent ECCO solution to its corresponding forward-model run that is not constrained by any data. ~~Both gridded~~ We examine separately local  $p_b$  anomalies relative to the spatial means, which are relevant for the study of the ocean circulation and dynamics (Section 3), and the spatial means themselves associated with barostatic sea level (Section 4) ~~are examined~~. Comparisons with GRACE establish the positive effects of the optimization in reducing differences with the data, which are discussed in the context of assumed data errors (Section 3.1). After analyzing the spatiotemporal characteristics of the adjustments to the  $p_b$  fields resulting from the full optimization (Section 3.2), the direct influence of GRACE data constraints on the ECCO solution is ascertained by contrasting  $p_b$  adjustments during periods with and without GRACE data (Section 3.3). The importance of GRACE constraints on barostatic sea level are discussed in Section 4. Interpretation of GRACE misfits remaining after the optimization is offered in Section 5. A section with a summary of results and brief discussion of some future implications concludes the paper.

## 2 Model, data and methods

55 We deal primarily with  $p_b$  fields in this work. For convenience, throughout the rest of the paper we express  $p_b$  values in terms of manometric sea level (Gregory et al., 2019), in units of length (equivalent water thickness). The conversion involves division

of pressure values by a mean seawater density ( $1029 \text{ kg m}^{-3}$ ) and the acceleration of gravity ( $9.81 \text{ m s}^{-2}$ ) (Gregory et al., 2019).

## 2.1 ECCO solution

60 Forget et al. (2015) provide a comprehensive treatment of ECCO Version 4 as a framework for global ocean state estimation. The ECCO Version 4 system combines the Massachusetts Institute of Technology general circulation model with a variety of ocean observations to produce estimates of the global ocean and sea ice state that are both a "best" fit to the data and an exact solution of the model equations. The non-linear optimization procedure is based on the method of Lagrange multipliers (aka adjoint method) and involves iterations of forward and adjoint model runs to minimize a cost function representing misfits of  
65 all observations and the model. The minimization is achieved through adjustments in control parameters, which in the case of ECCO Version 4 include atmospheric forcing fields, initial conditions, and internal mixing coefficients. For full details on the ECCO Version 4 assimilation platform, please refer to Forget et al. (2015).

In the minimization procedure, the cost function terms are based on the variance of the model-data differences divided by the square of the data errors. The latter, aside from instrument noise, include representation errors — "true" signals in the data  
70 that cannot be represented by the model (e.g., mesoscale eddies missing in coarse resolution models). In the particular case of the GRACE data relevant to our analysis, the estimated error standard deviation used in the optimization, ~~which~~ shown in Figure 1a, was derived ~~as explained by comparing the GRACE data against previous ECCO solutions following the methods detailed in~~ Quinn and Ponte (2008) and Fukumori et al. (2018), is shown in Figure 1a. Errors vary from a minimum of 1 cm, explicitly set to match typical GRACE error estimates (e.g., Quinn and Ponte, 2008; Watkins et al., 2015), to a few centimeters. Large values  
75 in the eastern tropical Indian Ocean, Gulf of Thailand, and near Japan, are the imprints of the strong Sumatra-Andaman and Tohoku earthquakes that are not fully corrected in the GRACE inversions and thus leak into the  $p_b$  fields — a clear example of representation error. Another example of such errors is the enhanced values in regions such as the Argentine Basin and the Agulhas Retroflexion, which seem to be affected by eddy ocean intrinsic variability associated with eddies and other nonlinear processes that cannot be represented in the coarse grids (nominally  $1^\circ$ ) of the model used in the ECCO estimates (Zhao et al.,  
80 2021). Enhanced values in other areas (Red Sea, Gulf of Carpentaria, Baffin Bay, Kara Sea) may reflect higher data noise related to similarly enhanced  $p_b$  variability (Figure 1b) or other representation issues as discussed in section 5.

The present analyses are based on the ECCO Version 4 Release 5 (ECCOv4r5) product — a basic extension of the publicly available Release 4 described in detail by Fukumori et al. (2019). Major differences in ECCOv4r5 include: an extended analysis period (January 1992–December 2019; Release 4 ends in December 2017); atmospheric forcing fields optimized from the  
85 Modern-Era Retrospective Analysis for Research and Applications Version 2 (MERRA-2; Gelaro et al., 2017) as the first guess; an adjointable sea ice thermodynamics model; Antarctica iceberg melting; and explicit treatment of ice shelf cavities (Nakayama et al., 2024). The ECCOv4r5 solution is constrained by most available observations listed in Fukumori et al. (2019). Aside from sea level, sea surface temperature and salinity data from satellites, and extensive use of in situ observations from Argo and other platforms, ECCOv4r5 includes  $p_b$  fields derived from GRACE and also GRACE Follow-On, which launched  
90 in May 2018. The  $p_b$  data, processed as detailed in Fukumori et al. (2018), were assimilated as monthly fields with respective

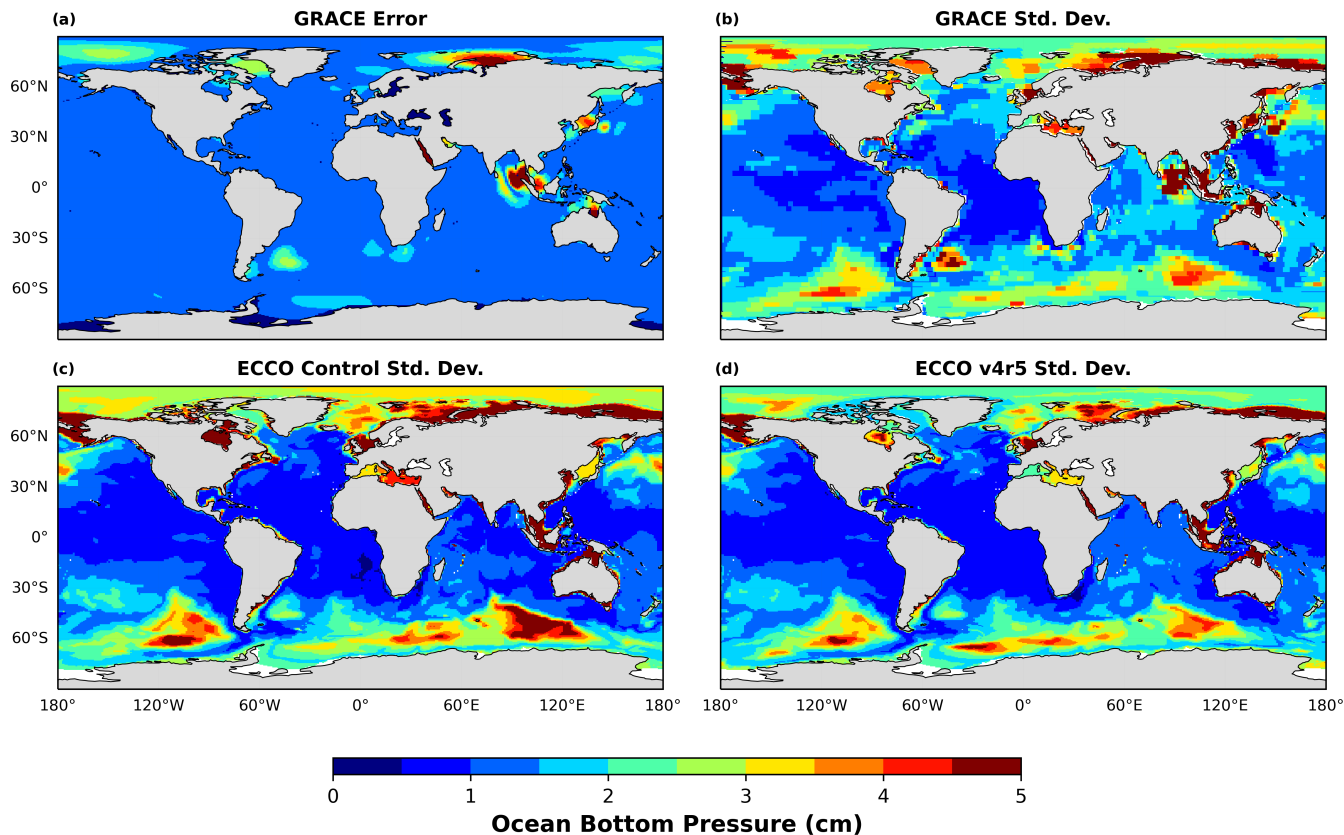

**Figure 1.** Standard deviation of (a) estimated GRACE error, and  $p_b$  fields for (b) GRACE data, (c) control run and (d) ECCOv4r5, based on their overlapping period, all in units of cm. Global spatial means have been removed from all the fields prior to the calculation of standard deviations.

global spatial means removed but otherwise retaining full temporal variability including trends. In the ECCO estimate, the effective spatial resolution of the GRACE data is approximately 300 km, achieved through the method described in Appendix E of Forget et al. (2015). All GRACE data, including those near coastal regions, are used to constrain the estimate. In addition to the [constraints](#) GRACE and other datasets documented in Fukumori et al. (2019), ECCOv4r5 is also constrained by estimates of Antarctic ice-shelf melt (Rignot et al., 2013; Nilsson et al., 2022) by adjusting the heat transfer coefficient between ice-shelf and ocean (Nakayama et al., 2024); these adjustments affect the freshwater flux (and heat flux) associated with the ice-shelf melt, but not salt flux because the salinity of ice-shelves is assumed to be zero.

For comparison with the optimized ECCOv4r5 solution, we also consider output from the respective control run (ECCOctrl), which consists of a forward model simulation using prior (unadjusted) estimates of the control parameters. Differences between ECCOv4r5 and ECCOctrl quantify the impact of the data constraints and optimization procedures on the estimated fields. In the same manner, we use Version 4 Release 1 and its control run, described in detail by Forget et al. (2015), to examine

$p_b$  adjustments in an optimization that involved most of the data constraints applied in ECCOv4r5 but excluded the GRACE data.

## 2.2 Bottom pressure data

105 We use global  $p_b$  estimates from GRACE mass concentration (mascons) fields provided by the Jet Propulsion Laboratory (JPL; Version RL06Mv02V; filename GRCTellus.JPL.200204\_202001.GLO.RL06M.MSCNv02CRI.nc; Watkins et al., 2015; Wiese et al., 2019). These data were used to constrain ECCOv4r5 and are thus most appropriate for our analyses. We note that version RL06Mv02V has since been retired and replaced by more recent versions, but changes between different versions are relatively small and calculations using more recent versions did not lead to any meaningful differences in our findings. Barystatic  
110 In this context, because the barystatic sea-level curves are produced using corresponding to the RL06Mv02V mascon fields could not be found in the GRACE Tellus archives, we chose to use one from the Wiese et al. (2024) dataset, which is a more recent version of JPL mascon fields but similar to the RL06Mv02V dataset. and The global ocean mass is computed by summing up mass anomalies over the ocean and removing the mass of the atmosphere.

Variability in  $p_b$  estimates derived from GRACE can be related to non-oceanographic geophysical processes, such as those  
115 due to changes in gravity, rotation and deformation (GRD) effects defined in Gregory et al. (2019) and associated with variable mass loads (air, water and ice) over land. To evaluate the impact of these processes on our ECCOv4r5 and GRACE analyses, we take advantage of recent estimates of GRD effects by Landerer and Wiese (2025). The product provides global, monthly gridded solutions to the sea level equation (GRD components), derived from JPL CRI-filtered GRACE mascon surface mass anomalies from April 2002 to present. (These GRD corrections were not available at the time ECCOv4r5 solution was derived.  
120 Thus, uncorrected GRACE data was used in the ECCOv4r5 optimization.)

## 3 Analysis of local $p_b$ fields

In this section, we examine gridded  $p_b$  anomalies defined relative to the respective global means discussed in section 4. The anomalies are used as separate constraints on ECCOv4r5 and represent the dynamically relevant  $p_b$  variability associated with changes in ocean circulation.

### 125 3.1 Basic effects of optimization on $p_b$ fields

The standard deviations of the local  $p_b$  anomalies for GRACE, ECCOctrl and ECCOv4r5 fields (Figure 1b,c,d) ~~defined relative to the respective global means discussed in section 4~~, are mostly consistent, in terms of spatial patterns and amplitudes. Maxima occur in shallow coastal regions, along the Southern Ocean (particularly in the Bellingshausen and Australian-Antarctic Basins) and in the Arctic, and minima are present over most of the tropics. There are, however, visible differences in variability between  
130 ECCOv4r5 and ECCOctrl over many regions (e.g., weaker ECCOv4r5 variability in the Barents Sea, Hudson Bay, Australian-Antarctic Basin, stronger in the Beaufort Gyre, Indian Ocean). Many of these differences make ECCOv4r5 amplitudes more consistent with those of GRACE, but the opposite can also be true (e.g., relatively large variability near the Weddell Sea).

In areas of western boundary currents (e.g., Agulhas retroflexion, Gulf Stream extension, Argentine Basin), GRACE fields look more energetic than both ECCOv4r5 and ECCOctrl, consistent with the presence in GRACE of eddythe effects of intrinsic variability that(Zhao et al., 2021). The imprint of eddies on  $p_b$  variability in these regions has been documented in studies based on in situ  $p_b$  observations (e.g., Hughes et al., 2007; Na et al., 2016; Androsov et al., 2020). Such intrinsic signals occur on a variety of spatiotemporal scales and can affect the GRACE data even if not fully resolved by the measurements. They cannot be represented in either ECCOv4r5 or ECCOctrl, however, and thus constitute representation errors that (1) partly contribute to the enhanced data errors in regions of strong unstable currents noted in as-discussed-in-relation-to Figure 1a and (2) effectively down-weight the GRACE data in those areas during the optimization.

TheApart from boundary current regions, strongest amplitude differences between GRACE and ECCO fields are found in the eastern tropical Indian Ocean and near Japan, however. The large GRACE variability, absent in both ECCOv4r5 or ECCOctrl, is the imprint of the large Sumatra-Andaman and Tohoku earthquakes that is not corrected for in the GRACE inversions and thus "leaks" into the  $p_b$  fields in Figure 1bdiscussed in relation to Figure 1a.<sup>c2</sup>

Results in Figure 1 hint at the impact of the optimization on the  $p_b$  anomaly fields, but a more quantitative assessment can be gleaned from the root-mean-square difference (RMSD; based on demeaned time series here and throughout the paper) between GRACE, ECCOctrl and ECCOv4r5 (Figure 2). Differences between ECCOv4r5 and ECCOctrl (Figure 2c) are not negligible compared to their variability in most of the global oceans (cf. Figure 1c,d). Largest changes are seen in the Mediterranean Sea, Arctic Ocean and various sectors of the Southern Ocean, as well as several shallow, enclosed seas and gulfs. These regions also correspond to some of the largest decreases in RMSD in GRACE–ECCOv4r5 compared to GRACE–ECCOctrl (Figure 2d). More generally, the mostly negative values in Figure 2d ( $\sim 88\%$  of all the grid points) imply that RMSD values for GRACE–ECCOv4r5 are for the most part smaller than those for GRACE–ECCOctrl(Figure 2d), i.e., ECCOv4r5 is for the most part closer to the GRACE data than ECCOctrl. Values  $< -0.5$  cm amount to 27% of the grid points in Figure 2d, and values over the Arctic and Southern Ocean average to  $-1.6$  cm and  $-0.5$  cm, respectively. The correlations of GRACE with ECCOv4r5 (not shown) are also higher on average by  $\sim 0.1$  than those with ECCOctrl. Thus, the RMSD and correlation analyses reveals relatively large changes in  $p_b$  fields and a closer fit to GRACE data brought about by the ECCO optimization.

Focusing on the RMSD for GRACE–ECCOv4r5 (Figure 2a), largest values of  $\sim 5$  cm coincide with areas of large variability (e.g., Bay of Bengal/Andaman Sea, around Japan, Arctic coastal regions) and smallest values ( $< 1$  cm) occur over most of the tropics where variability is weakest (Figure 1). These RMSD values are not small compared to the variability in either GRACE or ECCOv4r5, but they are for the most part comparable to the data errors used to weight the gravity data in the ECCOv4r5 optimization (Figure 1a).

The costs in Figure 3, i.e., the normalized quadratic misfits that constitute the cost function described in section 2.1, calculated as

$$\frac{\text{variance}(\text{GRACE} - \text{ECCO})}{(\text{GRACEerror})^2}$$

<sup>c2</sup>Changes in  $p_b$  arising from vertical motion of the bottom during earthquakes are possible but cannot be represented in the ECCOv4r5 setup, which uses a model with a fixed bottom. In any case, apart from the rapid barotropic adjustment to the initial perturbation, changes in  $p_b$  related to the long term changes in local depth are likely much smaller than the implied opposite changes in the solid earth, given difference in density of the latter compared to that of sea water.

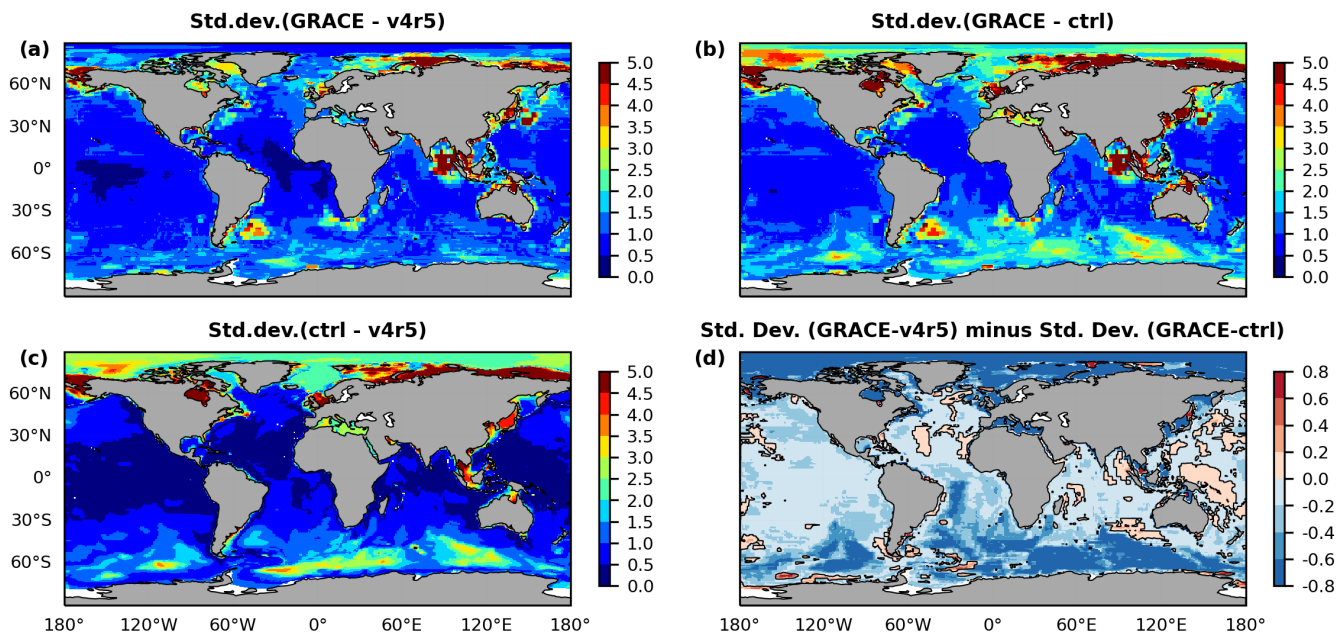

**Figure 2.** Standard deviation of the difference  $p_b$  fields (a) GRACE–ECCOv4r5, (b) GRACE–ECCOctrl and (c) ECCOctrl–ECCOv4r5, based on their overlapping period. Global spatial means have been removed from all the fields. The difference (a) minus (b) is shown in (d). Negative values imply ECCOv4r5 is closer to the GRACE data than ECCOctrl. Units are cm.

(i.e., the square of the ratio of values in Figure 2b,c to those in Figure 1a) and shown in Figure 3, provide a quantitative measure of how the optimization has consistently reduced differences to the data within respective data uncertainties. The relatively large costs ( $> 2$ ) in ECCOctrl observed at polar and subpolar latitudes, coastal areas and marginal seas are substantially reduced in ECCOv4r5 to values closer to 1, as expected in a converging optimized solution. There are, however, several areas with ECCOv4r5 costs considerably  $> 1$  (e.g., Siberian Shelf, Bering and Chukchi Seas, Hudson Bay, North Sea) that may suggest only partial convergence and/or underestimated data errors. The latter is plausibly the case for the large ECCOv4r5 cost values seen in the areas affected by the Sumatra-Andaman and Tohoku earthquakes. In contrast, there are many ECCOv4r5 and ECCOctrl cost values  $< 1$  (peak values the distributions at histograms display peaks at values of  $\sim 0.45, 0.65$ , respectively; not shown) and particularly in tropical latitudes. This points to the possibility of overestimated data errors, which were capped at a minimum of 1 cm (Figure 1a).

### 3.2 Nature of $p_b$ adjustments

A more detailed examination of the changes in  $p_b$  fields brought about by the ECCO optimization can provide useful insight on the characteristics of some of the major errors in the ECCOctrl estimate and elucidate various important aspects of the optimization. We first examine separately the linear trends and mean seasonal cycle as two major components of the  $p_b$  variability.

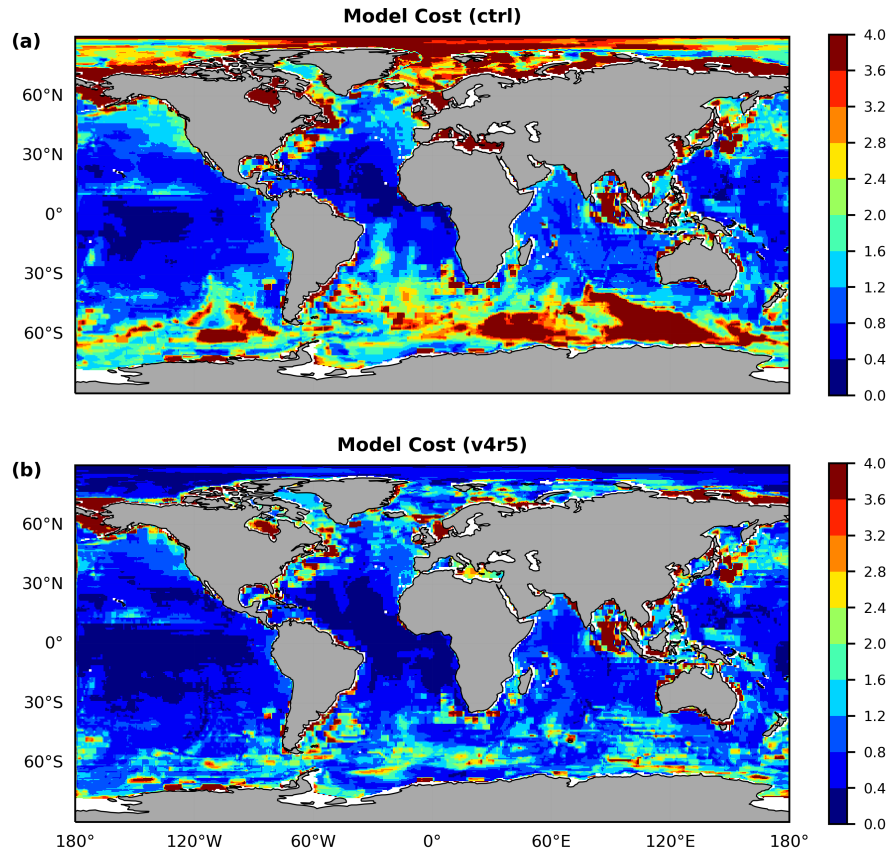

**Figure 3.** Costs calculated as the variance of the differences between GRACE and (a) ECCOctrl and (b) ECCOv4r5 (i.e., values in Figure 2a,b squared) divided by the square of the data error (values in Figure 1a squared).

Trends in Figure 4 exhibit for the most part basin-scale patterns of the same sign but are considerably different among the three fields. In particular, ECCOctrl has largest trends in the Arctic, the Mediterranean, and several shallow seas and coastal regions (e.g., Hudson Bay and a substantial part of the eastern North American and Patagonian shelves), which are not present in the [observations](#)[GRACE data](#). There are also relatively large trends tightly trapped to some coastal regions (e.g., southern Africa and southern Australia; Figure 4c) that appear to be too small scale to be representable in GRACE. All these large ECCOctrl trends are mostly adjusted by the optimization, with ECCOv4r5 considerably closer to GRACE than ECCOctrl in those regions (cf. Figure 4d,e). [Similar](#)[Strong large-scale](#) adjustments can [also](#) be seen in the [Atlantic sector of the Southern Ocean](#) [and parts of the South Atlantic](#), where the mostly negative trends in ECCOctrl become positive in ECCOv4r5, [mimicking more of the trend pattern seen in GRACE](#).

In contrast, relatively large GRACE trends in the eastern tropical Indian Ocean and near Japan are not present in either ECCOctrl or ECCOv4r5. The apparent rejection of these GRACE trends in the optimization is consistent with the data weights

in Figure 1a and the non-oceanographic, earthquake-related nature of these signals, as already discussed. Similar rejection of GRACE trends occurs in other areas such as Baffin Bay and the eastern North Atlantic. These trends are partly related to GRD effects discussed in Section 5, which are present in the data but not physically modeled in ECCO. Yet other areas show trend changes from ECCOctrl to ECCOv4r5 that increase (rather than decrease) the differences with GRACE (e.g., shift from negative to positive trends in the Argentine Basin). Thus, observational constraints other than those from GRACE can also have an impact on the  $p_b$  trends, which is not necessarily consistent with the GRACE data.

The seasonal cycle is a main component of  $p_b$  variability (e.g., Ponte, 1999, Figure 3). The mean seasonal cycle is defined as the average of all values for each calendar month from January to December. The standard deviations of the resulting 12-month mean series are similar among GRACE, ECCOctrl and ECCOv4r5 (Figure 5a,b,c). Values range from  $< 1$  cm over most of the oceans to higher values (typically 1–3 cm) in subtropical and subpolar gyres, the Arctic and the Southern Oceans, and many coastal regions. The optimization produces sizable changes in the mean seasonal cycle (Figure 5f)<sup>c2</sup>, particularly in those higher variability regions, with ECCOv4r5 considerably closer to GRACE than ECCOctrl (Figure 5d,e). The improved data fit for ECCOv4r5 implies both stronger (e.g., Beaufort Gyre) and weaker (e.g., Australia-Antarctic basin) seasonal cycles produced by the optimization.

Similar findings arise when examining the residual  $p_b$  variability upon removal of linear trends and mean seasonal cycles (Figure 6). Again adjustments to ECCOctrl (Figure 6f) are comparable in magnitude to the variability (Figures 6b,c) and ECCOv4r5 is for the most part a better fit to GRACE (cf. Figure 6d,e). Large differences in variability seen in the eastern tropical Indian Ocean and near Japan indicate remaining earthquake signals, which as expected are not removed by simply detrending over the full length of the GRACE record.

Taken together, Figures 4–6 indicate that adjustments in  $p_b$  occur over the full range of timescales contained in the records. Empirical orthogonal function (EOF) analysis provides a concise description of not only the temporal but also the spatial nature of the  $p_b$  adjustments. Here, we use Python package "eofs v2.0.0" (Dawson, 2016) to calculate EOFs for the full ECCOctrl–ECCOv4r5 fields (extending over 1992–2019) for completeness, but an analysis restricted to the GRACE period, as in Figures 4–6, yields similar results. When using the raw ECCOctrl–ECCOv4r5 fields, the first EOF basically reproduces the long-term trend pattern in Figure 4f and accounts for  $\sim 2/3$  of the total variance (not shown). To focus on the remaining variability, the EOFs calculated using detrended fields are shown in Figure 7. The seasonal cycle is dominant in modes 1 and 2, which contribute  $\sim 38\%$  of the total variance; modes 3 through 5 account for another  $\sim 20\%$  of the variance, with their principal components containing more mixed seasonal and nonseasonal variability compared to modes 1 and 2. In particular, mode 3 shows a strong loading in the Atlantic sector of the Southern Ocean and a change in trend around 2002, reflecting in part the effects of GRACE constraints on the trends in that region, discussed in relation to Figure 4.

In terms of spatial structure, all EOFs in Figure 7 exhibit basin-scale, same-sign patterns. For example, mode 1 consists mostly of an out-of-phase pattern between high latitudes and low and mid latitudes, and similarly for mode 2 between the Southern and Indian Oceans and the rest of the ocean. Similar large scale patterns are present in modes 3 through 5. The Arctic

---

<sup>c2</sup>Aside from the changes in magnitude that can be inferred from Figure 5, examination of the month of maximum value (not shown) suggests that the optimization also leads to changes in the phase of the mean seasonal cycle.

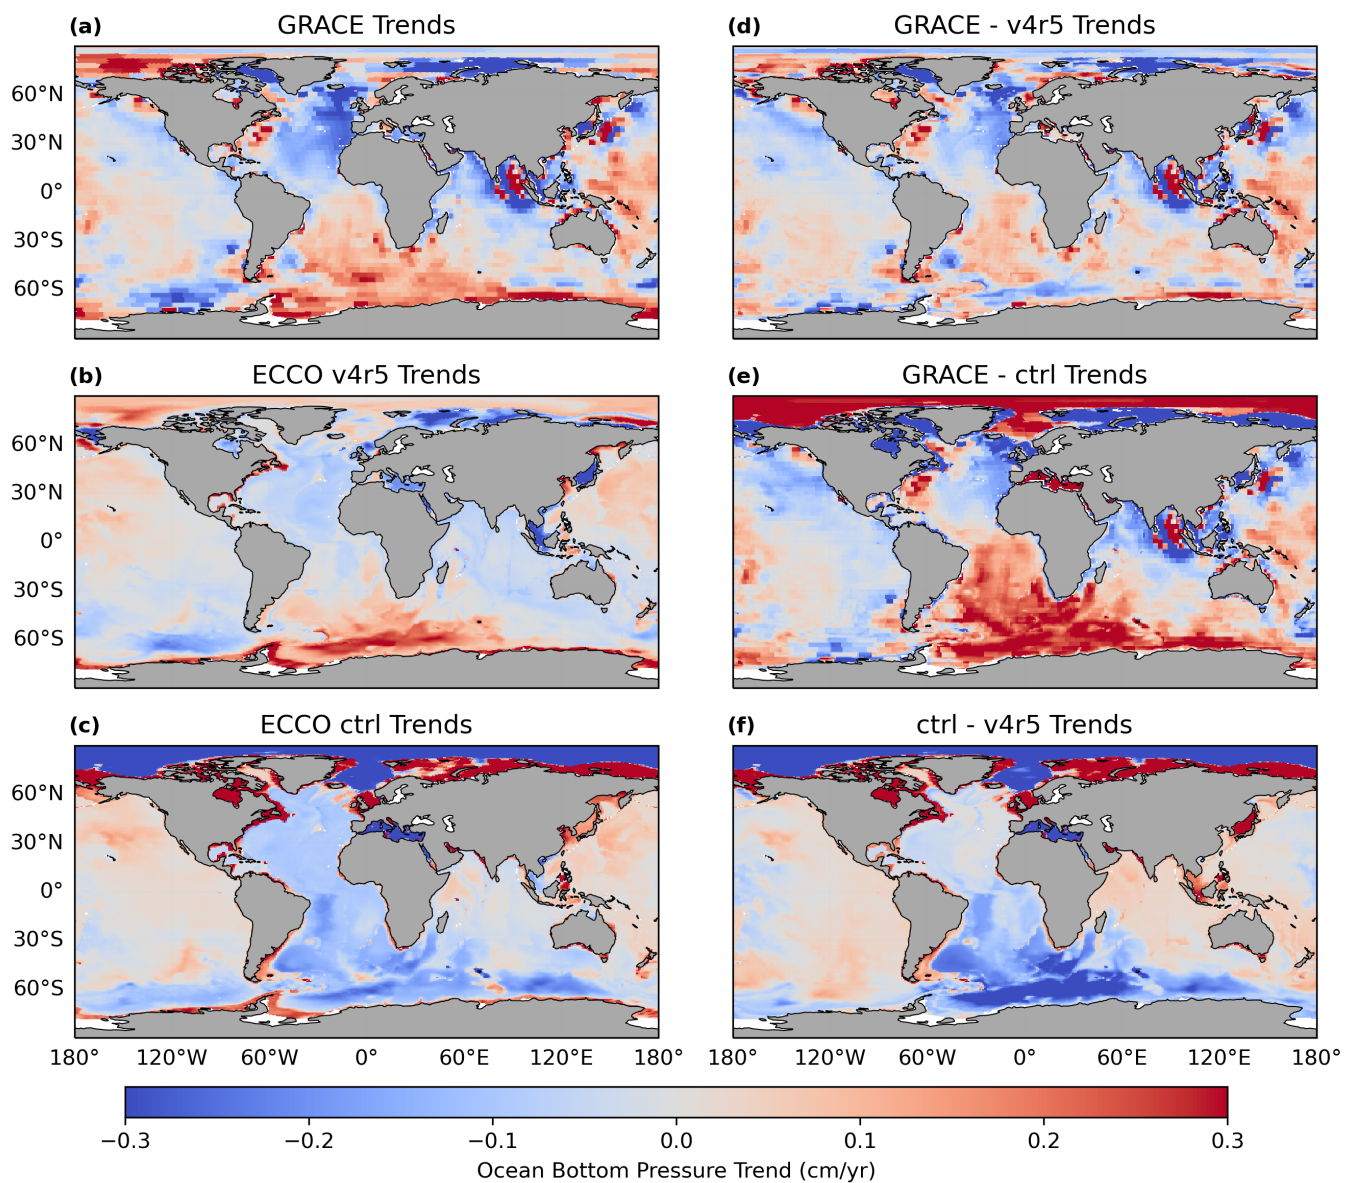

**Figure 4.** Trends of  $p_b$  fields for (a) GRACE, (b) ECCOv4r5, and (c) ECCOctrl, and respective differences (d) GRACE–ECCOv4r5, (e) GRACE–ECCOctrl, and (f) ECCOctrl–ECCOv4r5, all in units of cm/yr and based on the ECCO and GRACE overlapping period.

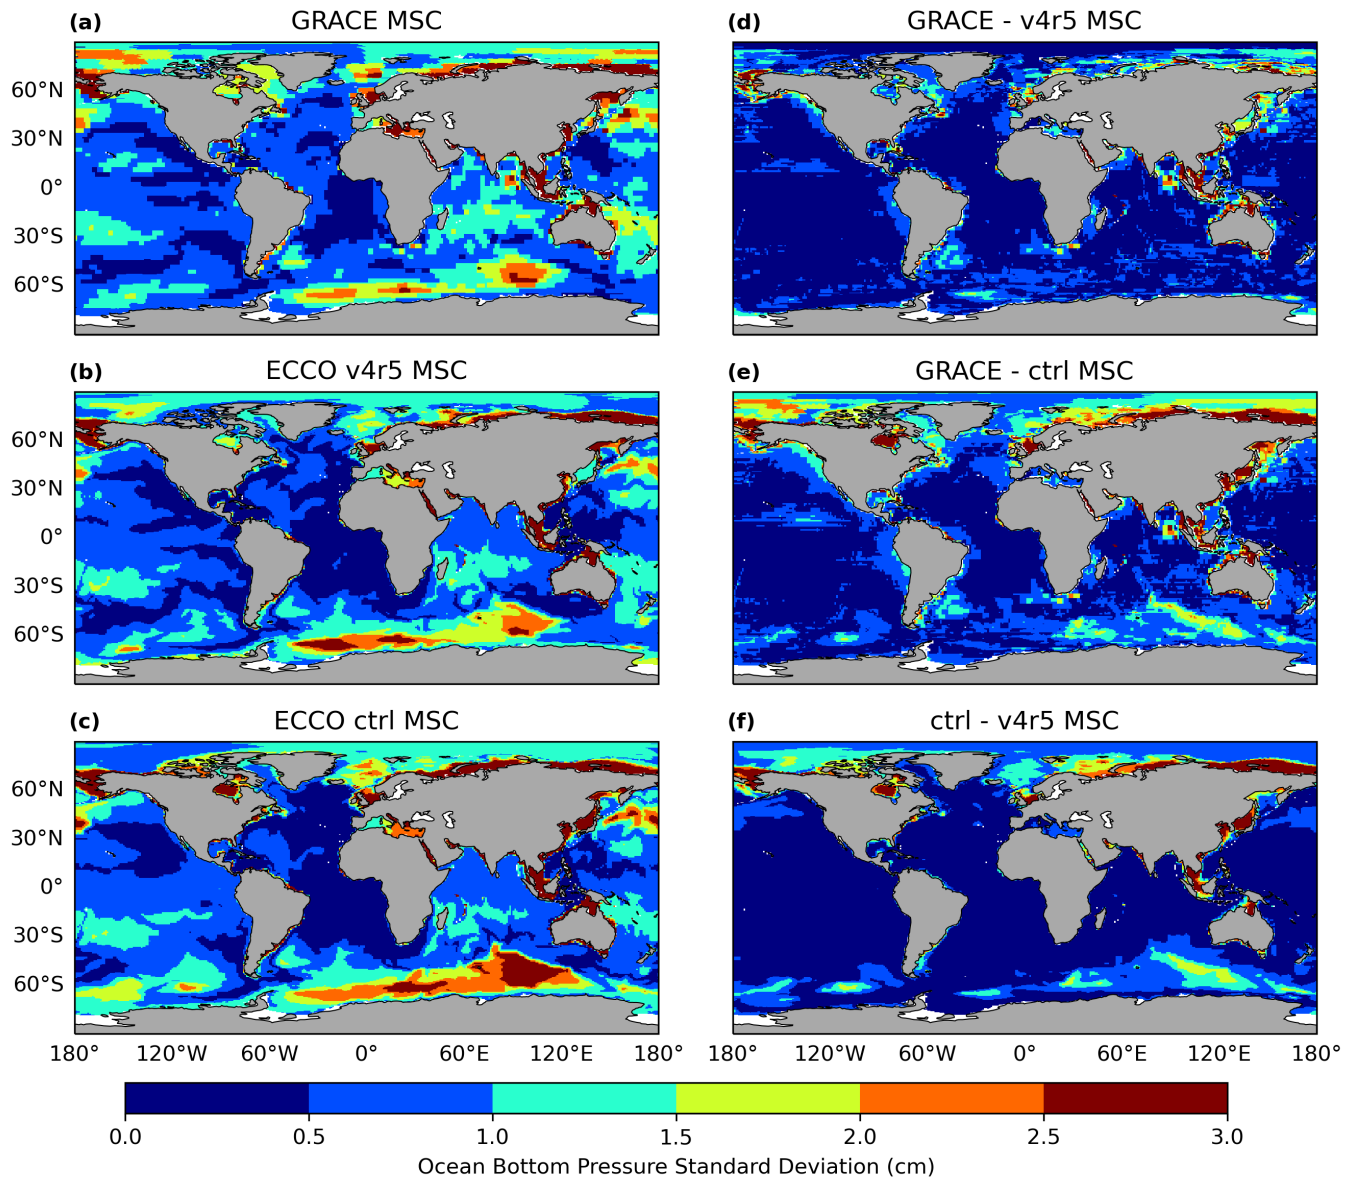

**Figure 5.** Standard deviations of the mean seasonal cycle in  $p_b$  fields for (a) GRACE, (b) ECCOv4r5, and (c) ECCOctrl, and of their respective differences (d) GRACE–ECCOv4r5, (e) GRACE–ECCOctrl, and (f) ECCOctrl–ECCOv4r5, all in units of cm and based on the ECCO and GRACE overlapping period.

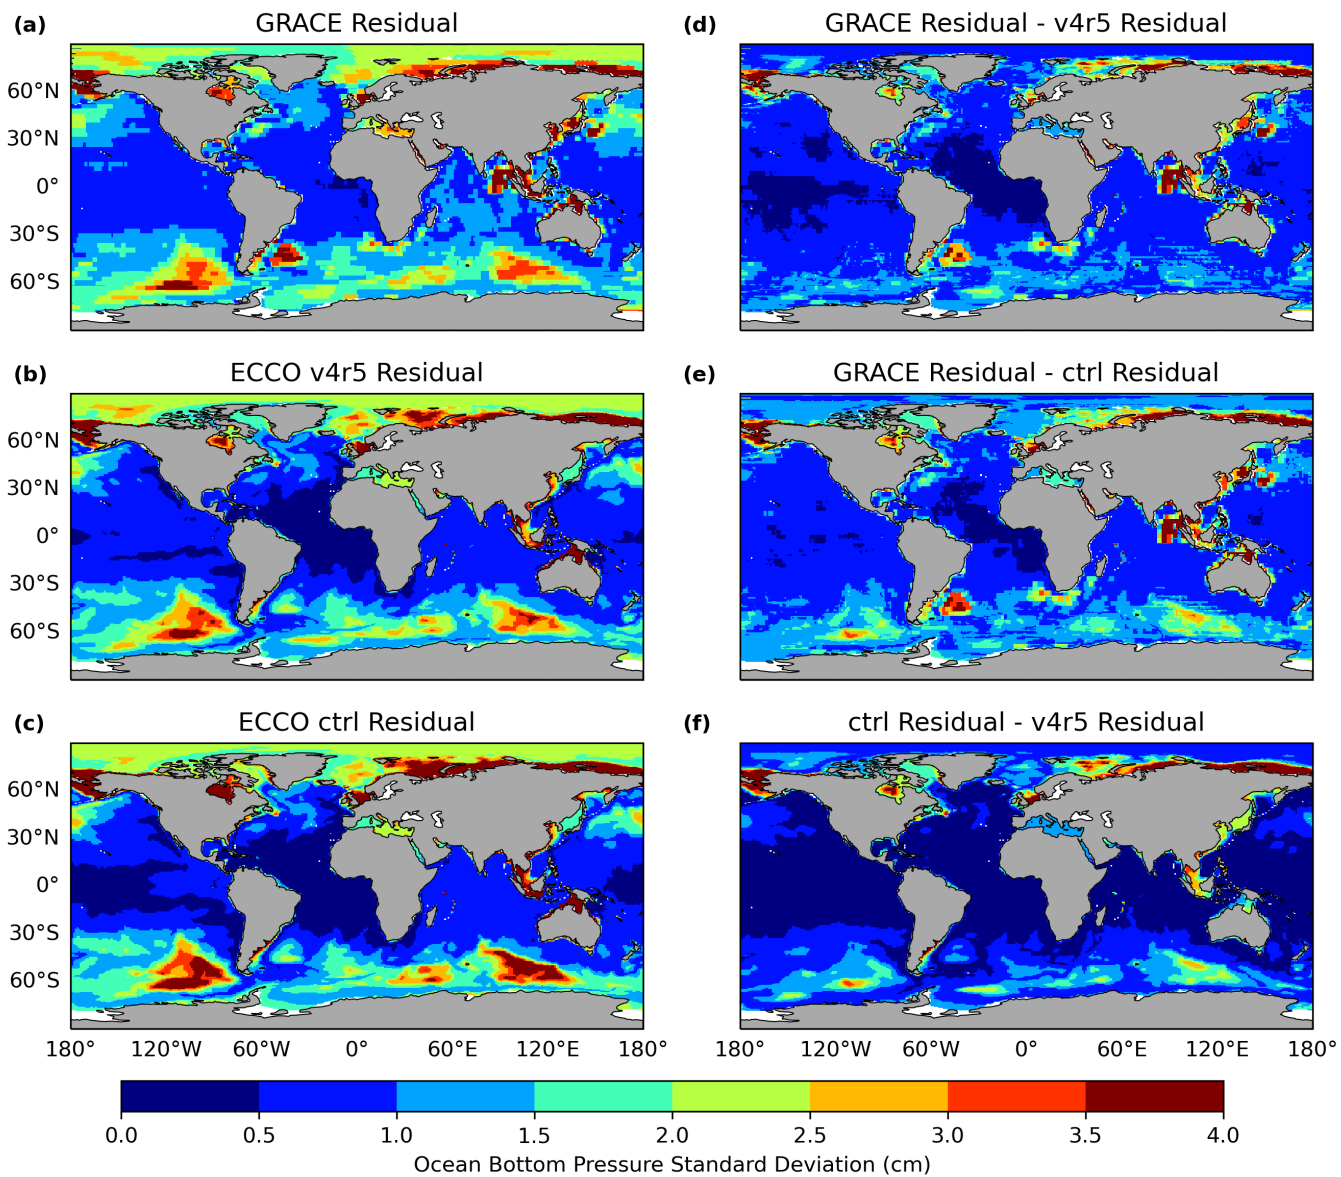

**Figure 6.** Standard deviations of the residual  $p_b$  time series obtained by removing the trends and the mean seasonal cycle for (a) GRACE, (b) ECCOv4r5, and (c) ECCOctrl, and of their respective differences (d) GRACE–ECCOv4r5, (e) GRACE–ECCOctrl, and (f) ECCOctrl–ECCOv4r5, all in units of cm and based on the ECCO and GRACE overlapping period.

220 and Southern Oceans as well as some coastal regions feature prominently in the modes, with the loadings generally consistent with the magnitudes of the  $p_b$  adjustments in Figures 5f and 6f.

### 3.3 Impact of GRACE data on optimization

Whether the  $p_b$  adjustments described in Figures 4-7 can be associated with the impact of GRACE data constraints remains an important question. Common methods to examine such questions include data withdrawal experiments, where one might  
225 compare solutions optimized with and without GRACE constraints (e.g., Köhl et al., 2012). In this study, we do not use such specific experiments but instead take advantage of the fact that GRACE record only starts in 2002 and contains several gaps since its inception. This allows us to evaluate the  $p_b$  adjustments during periods when GRACE data is available versus when it is not. Notably, the principal components of all the EOFs in Figure 7 generally show different and enhanced variability after around 2002 (e.g., larger seasonal adjustments in mode 1, marked change in trend in mode 3), which coincides with the  
230 beginning of GRACE observations.

To ascertain the effect of the GRACE constraints, we calculate the spatial standard deviations of the ECCOctrl–ECCOv4r5 fields as a function of time (Figure 8). Results based on the raw fields over the global ocean (Figure 8a) show a bowl-shaped pattern of larger adjustments at the end points and minimum values in the middle of the record. This shape coincides with the behavior of the standard deviation of ECCOctrl  $p_b$  fields, also shown in ~~the figure, and confirms the importance of adjustments to the~~  
235 ~~linear trends in ECCOctrl (Figure 4) — the large positive and negative trends contribute strongly to the spatial standard deviation values in Figure 8a~~ in contrast with the rather flat nature of the standard deviation of ECCOv4r5 fields. Results based on detrended fields (Figure 8b) show no bowl-shape characteristics for any curves. The changes to the linear trends in ECCOctrl brought about by the optimization (Figure 4) are thus the main reason behind the larger adjustments at the end points for ECCOctrl–ECCOv4r5 curve in Figure 8a.

240 Once ECCOctrl–ECCOv4r5 fields are detrended, there is a clear tendency for larger  $p_b$  adjustments after GRACE data becomes available (Figure 8b). The average value over months with GRACE data is 1.20 cm compared to 0.85 cm for months without it. Values over the ~ 1-year gap between GRACE and GRACE-FO average to 0.72 cm, similar to levels prior to the onset of GRACE in 2002. Moreover, local minima tend to coincide with multiple shorter data gaps that occur particularly after 2011 until the demise of the GRACE mission in 2017. The consistently lower  $p_b$  adjustments over most data gaps, includ-  
245 ing that between GRACE and GRACE-FO, are strong evidence of the impact of the gravity data in ECCOv4r5. Calculations restricted to various latitude bands (not shown) yielded similar results, pointing to the effects of GRACE constraints over most regions.

Apart from the introduction of GRACE data in 2002, a major change in the observing system was the deployment of Argo floats, which started in the early 2000s and reached maturity during the second half of the decade. To assess whether such  
250 development could also contribute to the enhanced  $p_b$  adjustments after 2002, Figure 8b shows the spatial standard deviations of the  $p_b$  adjustments based on the earlier Version 4 Release 1 fields, which included all the Argo data but not the GRACE data. The  $p_b$  adjustments for Release 1 show no visible enhanced values after the onset of Argo deployments and typical values

ctrl - v4r5 Detrended

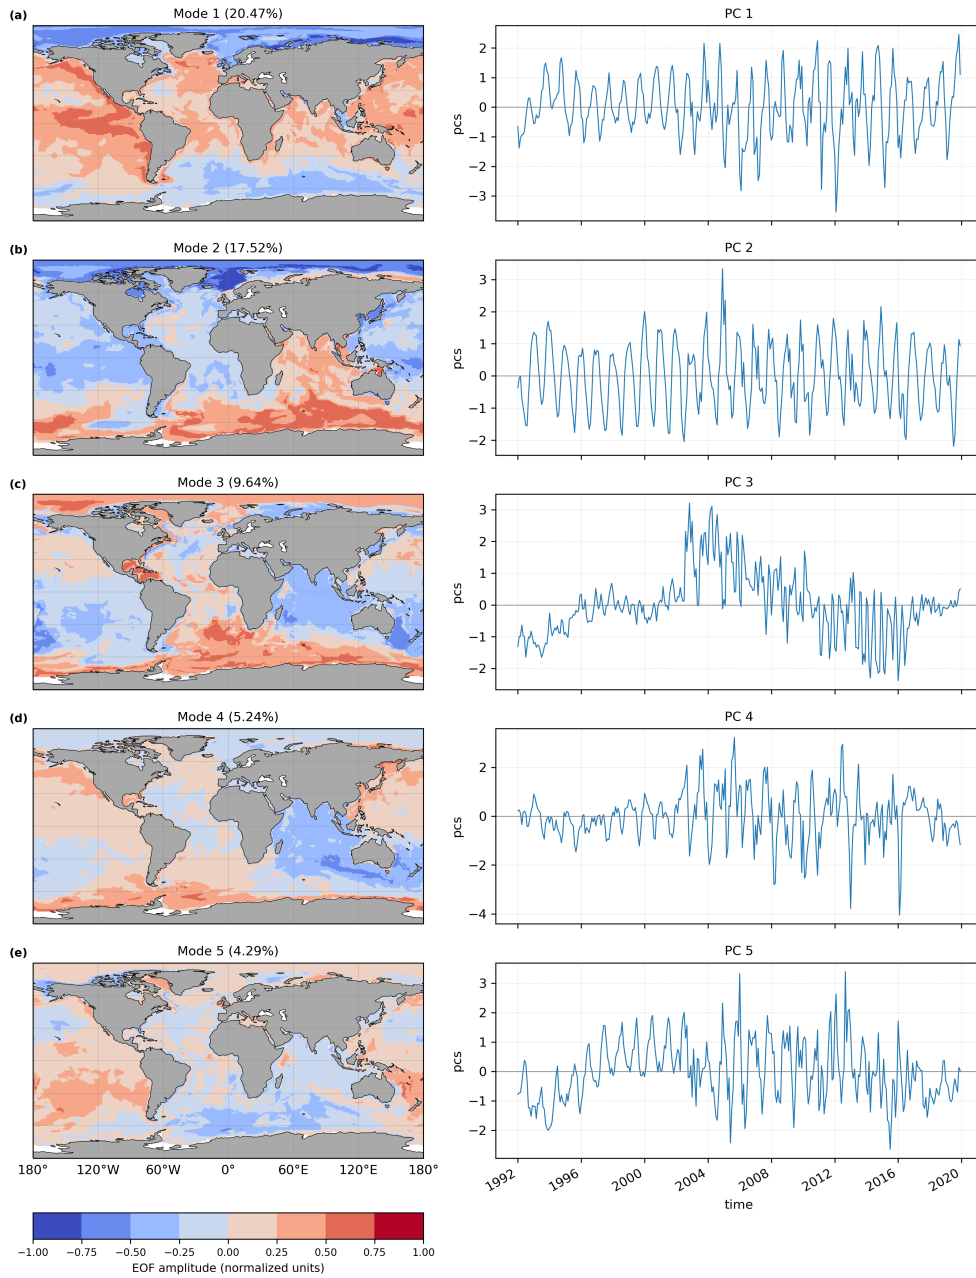

**Figure 7.** First five empirical orthogonal functions of the detrended ECCOctrl–ECCOV4r5  $p_b$  fields based on the full 28-year record (1992–2019). Time series of principal components (PC) are in units of cm.

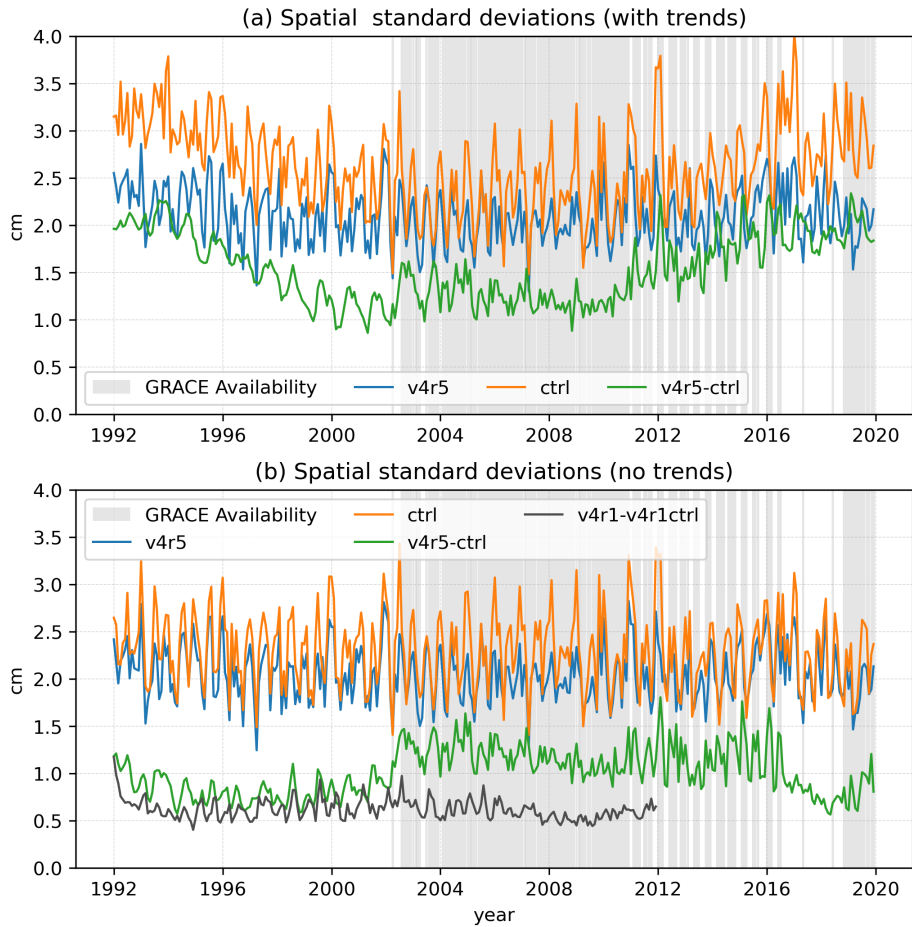

**Figure 8.** Time series of the spatial standard deviation (cm) of the ECCOctrl–ECCOv4r5  $p_b$  fields (green), calculated based on (a) full values and (b) detrended values. Black curve in (b) denotes the standard deviation of differences between ECCOv4r1 and respective control run for comparison. Shaded areas denote periods with GRACE data availability. Standard deviations of the corresponding  $p_b$  fields for ECCOctrl (orange) and ECCOv4r5 (blue) are also shown for comparison context.

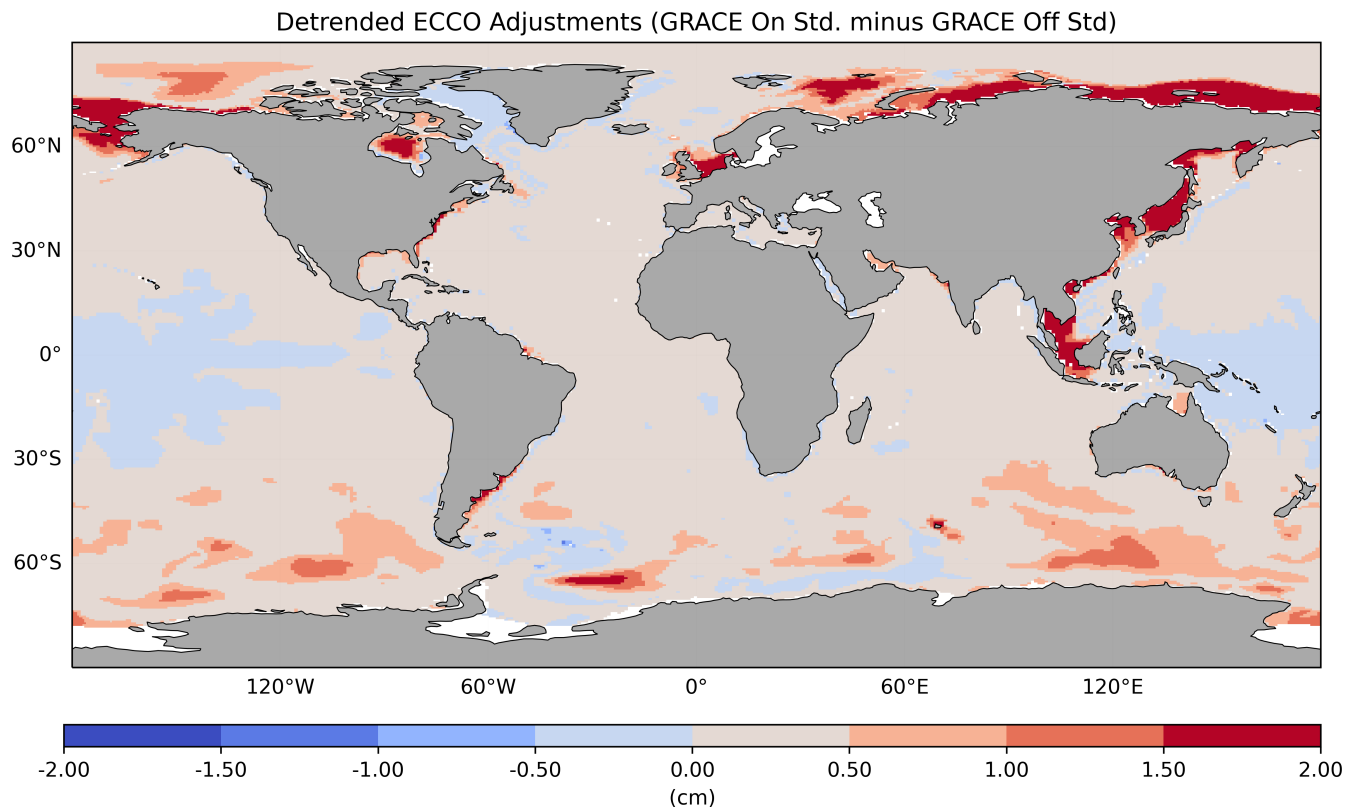

**Figure 9.** Difference in the temporal standard deviations of detrended ECCOctrl–ECCOv4r5  $p_b$  fields, calculated for periods with and without GRACE observations. Positive values indicate larger  $p_b$  adjustments for periods with GRACE data.

similar to those associated with ECCOv4r5 results for periods without GRACE data. Thus impact of Argo data constraints on  $p_b$  are deemed not essential for explaining the behavior observed in the ECCOv4r5 results.

255 For a complementary analysis detailing regional influences, we calculate the difference in the temporal standard deviations of detrended ECCOctrl–ECCOv4r5 fields for periods with and without GRACE observations (Figure 9). Again larger  $p_b$  adjustments are observed over most of the global ocean (~ 87% of the grid points) for periods with available GRACE data. Differences in adjustments > 0.5 cm are seen for ~ 13% of values, with largest differences occurring in the Arctic (near Franz Josef Land and in Beaufort Sea) and Southern Oceans and some marginal seas and coastal regions (e.g., Siberian Shelf, Bering and Chukchi Seas, Hudson Bay, North Sea, Japan/East Sea, Gulf of Thailand/South China Sea).

260

The behavior of  $p_b$  adjustments implied in Figures 8 and 9 (and also Figure 7) is thus consistent with a direct impact of the GRACE data on the optimization of the ECCOv4r5  $p_b$  fields. The differences in GRACE–ECCOv4r5 variability between periods with and without GRACE data are sizable compared to that of the  $p_b$  adjustments (cf. Figures 9, 5f and 6f). While the

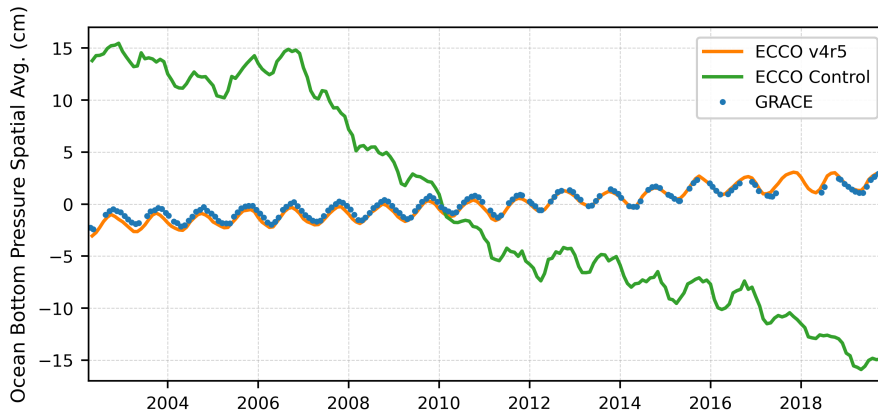

**Figure 10.** Global spatial means of raw  $p_b$  fields for GRACE data (blue), ECCOv4r5 (orange) and control run (green), expressed as values of barystatic sea level (Gregory et al., 2019) in units of cm. The ECCO spatial means have been corrected for spurious changes resulting from the Boussinesq model physics and reflect the true net mass change due to net freshwater fluxes from evaporation, precipitation and river runoff, as well as from ice shelf cavities and icebergs.

influence of GRACE data on constraining long-term trends in  $p_b$  cannot be elucidated by our analysis, the impact on timescales ranging from monthly to interannual seems clear.

#### 4 Global ocean mean mass analysis

The spatial mean of the  $p_b$  fields derived from GRACE provides an estimate of the changes in the global ocean mass including floating ice and snow, once effects of atmospheric mass over the ocean and other known geophysical effects like glacial isostatic adjustment are accounted for. In the real freshwater flux model formulation used in the ECCOv4r5 setup, total ocean mass is directly tied to the precipitation, evaporation and runoff forcing fields, as well as melting input from including exchange with icebergs and ice shelf cavities. The model employs the Greatbatch (1994) correction to ensure mass conservation. In the ECCOv4r5 optimization, global mean ocean mass and sea level were simultaneously brought into agreement with GRACE and altimetry estimates by adjusting the precipitation fields with a time-varying, spatially constant factor, while ensuring that such modified forcing did not incur any substantially larger costs for all the other data constraints in the system.

The spatial means representing total ocean mass estimated from GRACE, ECCOv4r5 and ECCOctrl are shown in Figure 10, expressed in terms of the corresponding changes in barystatic sea level (Gregory et al., 2019). The ECCOctrl series exhibits a very different behavior from GRACE series, which reflects large imbalances in the net freshwater flux into the ocean, as estimated from the forcing fields provided by MERRA-2 reanalysis. The large negative trend in ECCOctrl series implies an ocean mass loss equivalent to a barystatic sea level drop of  $\sim 30$  cm over less than 2 decades, which is unrealistic in both sign and amplitude when compared to GRACE.

In contrast, the ECCOv4r5 estimate of ocean mass is much more consistent with the observations, implying a barystatic sea level rise of  $\sim 5$  cm over the period examined (Figure 10). There is also good agreement in their respective annual cycles. The RMSD between ECCOv4r5 and GRACE is  $\sim 3$  mm, similar to the estimated errors in GRACE of  $\sim 2$  mm (Quinn and Ponte, 2008; Fukumori et al., 2018). Thus, ECCOv4r5 provides a reasonable fit to the GRACE series within its expected uncertainty.

## 285 5 Interpretation of GRACE misfits

The focus in previous sections has been on contrasting ECCOv4r5 and ECCOctrl results to evaluate the impact of GRACE and all other data constraints on the ECCO optimization of  $p_b$  fields. Here we turn to exploring the nature of the GRACE–ECCOv4r5 differences (Figure 2a), which is important to better understand remaining data and model issues and improve future GRACE-constrained ECCO solutions. In principle, the misfits in Figures 2a, 4d, 5d and 6d can be due to data noise, representation  
290 errors or model errors resulting from an incomplete optimization. Ponte et al. (2024) discussed ECCOv4r5 and GRACE misfits in the context of the mean seasonal cycle in  $p_b$ , which were partly attributed to: (1) data noise, particularly related to resolution and leakage issues that tend to contribute to larger misfits around the boundaries (cf. Figure 5d); (2) representation errors associated with GRD effects (Gregory et al., 2019) and intrinsic ocean variability (Zhao et al., 2021). We revisit these issues here expanding the analysis to include trends and nonseasonal variability.

295 Using an EOF decomposition of the GRACE–ECCOv4r5 fields, the first five modes (Figure 11) account for  $\sim 2/3$  of the total variance, and nearly  $1/3$  of the variance is associated with mode 1, mostly related to long-term trends in the fields. Mode 1 is clearly affected by the great Sumatra-Andaman and Tohoku earthquakes, with changes in behavior of its principal component evident in 2004 and 2011, but there are strong loadings in other places (e.g., Arctic, North Atlantic, near Antarctica). The Sumatra-Andaman earthquake and to a lesser extent the Tohoku earthquake seem to affect also mode 2, which includes  
300 more of the seasonal component that is predominant in modes 3 and 4. More mixed monthly to interannual variability relates to mode 5, [with an apparent large change across the GRACE and GRACE-FO gap](#). Loading patterns in modes 3–5 are mostly basin scale, with enhanced magnitudes near some continental boundaries (e.g., around South America in mode 4).

The long-term trends highlighted by the EOFs in Figure 11 can be partly due to representation errors associated with geophysical processes of non-oceanographic origin. ~~We have already noted the importance of e~~Earthquakes, which typically involve  
305 large step-like, co-seismic jumps and post-seismic nonlinear temporal behavior (e.g., Han et al., 2013). These signals can be modeled empirically and removed from the GRACE fields, as done for several products recently made available (e.g., Dahle et al., 2025; Bonin et al., 2026). Although not available for the GRACE product employed in this work, such an earthquake correction, based on the model of Han et al. (2013), is currently being developed and is planned for inclusion in the next release of the JPL mascon solutions (D. Wiese, personal communication, 2025). Given a focus on  $p_b$  and ocean dynamics,  
310 future GRACE data constraints might make use of fields that have been corrected for all major earthquake signals.

Other geophysical factors that can contribute to GRACE–ECCOv4r5 fields include GRD effects and glacial isostatic adjustment (GIA; Whitehouse, 2018). Expanding on the treatment of the mean seasonal cycle discussed by Ponte et al. (2024), here we make use of the recent GRD estimates by Landerer and Wiese (2025) to examine their possible effects on

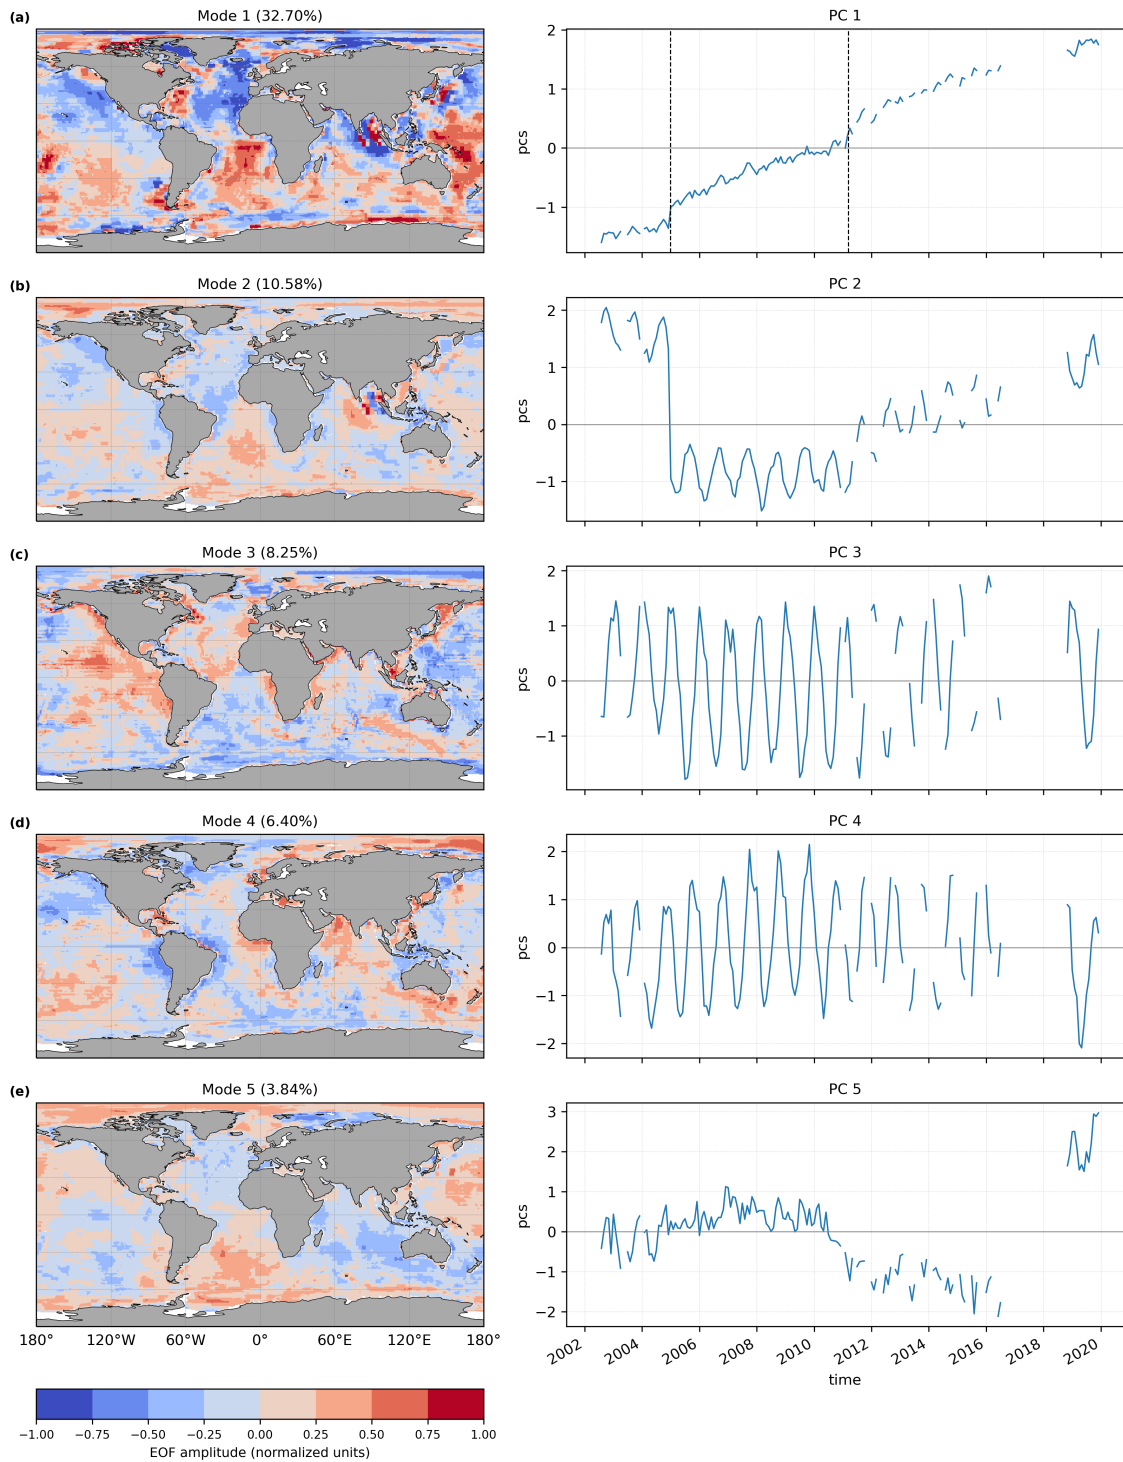

**Figure 11.** First five empirical orthogonal functions of the GRACE–ECCOV4r5  $p_b$  fields. Time series of principal components (PC) are in units of cm.

GRACE–ECCOv4r5 fields. Trends in GRD fields (Figure 12a) are relatively large around Greenland and west Antarctica and related to the melting of ice sheets and glaciers. Other GRD variability (Figure 12b) is also seen around many continental boundaries (e.g., western North America, South America, Southeast Asia), which is mostly related to the seasonal cycle in land hydrology.<sup>c5</sup> The percentage of variance in GRACE–ECCOv4r5 misfits explained by GRD effects (Figure 12c), calculated as

$$\left[1 - \frac{\text{variance}(\text{GRACE} - \text{ECCOv4r5} - \text{GRD})}{\text{variance}(\text{GRACE} - \text{ECCOv4r5})}\right] \times 100\%,$$

is substantial in some of these areas. Differences between results using full versus detrended fields (Figure 12c,d) indicate the importance of trends in Baffin Bay, eastern subpolar North Atlantic, and the Amundsen/Bellingshausen Sea sectors of coastal Antarctica, where values of percentage variance explained are largest (> 50%). Aside from trends, GRD variability mostly associated with the seasonal hydrological cycle in the Amazon can also explain > 50% of the variance in detrended misfits  
315 around South America (Figure 12d). Similar results apply to other coastal regions like western North America. These latter findings are consistent with those in Ponte et al. (2024).

Unlike GRD effects, GIA is solely related to long-term trends (Whitehouse, 2018). Although such trends are modeled and removed from GRACE fields (Watkins et al., 2015), uncertainties in the models (Caron et al., 2018) can also contribute to differences between ECCOv4r5 and GRACE. Estimates of GIA trend errors by Caron et al. (2018), on the order of 1 mm/year  
320 away from the main glaciation regions, are not negligible compared to differences in GRACE, ECCOv4r5 trends in Figure 4d. Moreover, enhanced GIA errors in parts of the Arctic (Kara, Barents and Beaufort Seas) and in coastal Antarctica (cf. Figure 3, Caron et al., 2018) coincide with regions of relatively large differences between ECCOv4r5 and GRACE. Although estimated uncertainties in GIA trends can depend on the methodologies used to derive them (e.g., Simon and Riva, 2020), both the pattern and magnitudes of GIA trends and their uncertainties (cf. Figure 3, Caron et al., 2018) suggest that errors in modeled  
325 GIA trends can contribute to the results in Figures 2 and 4d, particularly near the glaciation regions and in the Arctic.

All the geophysical signals discussed so far can be regarded as representation errors that are best removed from the GRACE observations, if suitable corrections are available. Other representation errors implicit in the ocean model should also be noted. We have already mentioned the effects of intrinsic variability associated with eddies and other nonlinear dynamics, which arise at scales not resolved by the ECCOv4r5 setup but can affect  $p_b$  variability at the scales observed by GRACE (Zhao  
330 et al., 2021, 2023). The studies of Zhao et al. (2021) and Ponte et al. (2024) are consistent with the influence of intrinsic signals on the enhanced misfits in regions such as the Argentine Basin and the Agulhas Retroflexion (Figures 2a, 5d and 6d). Similar effects may be active in other regions of large eddy activity (e.g., near the Gulf Stream and Kuroshio). Issues of resolution can also lead to representation errors in coastal regions where relatively small-scale boundary geometry and bathymetry features are important. For example, poorly resolved connections between the Gulf of Carpentaria and the Pacific or Hudson Bay and  
335 the Atlantic are likely to hamper the ability to faithfully represent  $p_b$  variability in those regions.

---

<sup>c5</sup>There are considerable seasonal GRD effects associated with air masses over land, particularly around Eurasia (e.g., Vinogradova et al., 2011, see their Figure 2), but these are not included in the fields from Landerer and Wiese (2025).

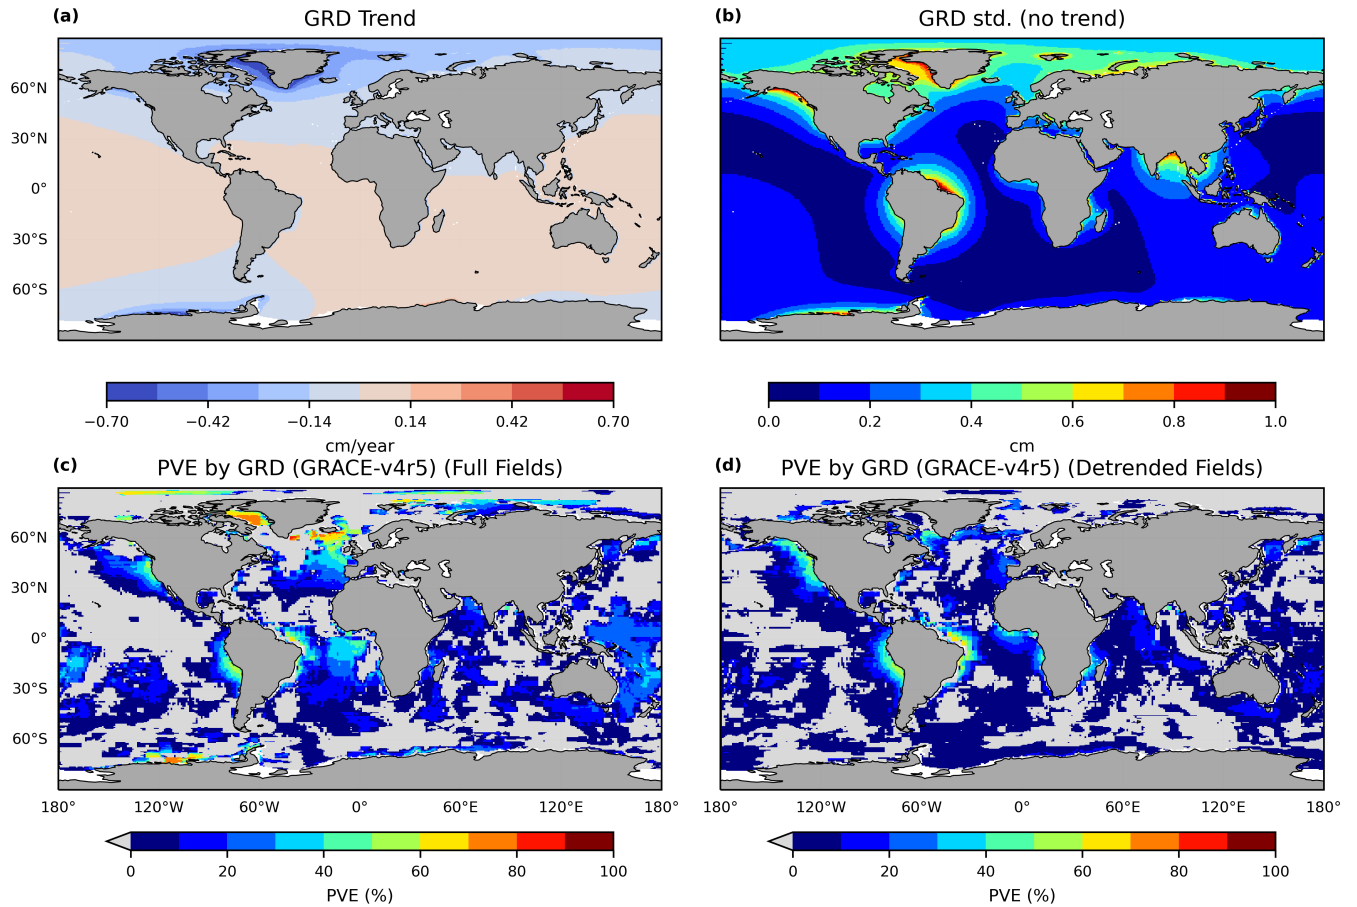

**Figure 12.** (a) Trends (cm/yr) and (b) standard deviations (cm) of the GRD fields, and (c,d) the percentage of variance in GRACE–ECCOv4r5  $p_b$  fields explained by GRD, based on full fields (c) and detrended fields (d).

## 6 Summary and concluding remarks

Ocean bottom pressure ( $p_b$ ) is a key variable for tracking changes in the state of the oceans and climate, but space gravity data from GRACE provides relatively limited resolution in space and time. Ocean models can help fill data gaps but are prone to errors. This study uses the ECCO state estimation framework to assess the impact of data constraints, in particular those provided by both local and global mean GRACE data, on optimizing model-based solutions and determining “best estimates” of  $p_b$  fields. Based on comparisons of ECCOv4r5 and ECCOctrl fields (section 3.1), the full data constraints lead to substantial adjustments of local  $p_b$  fields. Largest changes occur at polar/subpolar and coastal regions, where  $p_b$  variability is also largest. The optimized  $p_b$  fields in ECCOv4r5 are mostly closer to the GRACE data, within expected uncertainties. Modifications to the  $p_b$  fields occur over all timescales, from monthly to multi-decadal, and tend to have large, basin scales (section 3.2).

345 The  $p_b$  adjustments for periods with GRACE constraints are notably larger than those for periods without GRACE data (section 3.3). Differences in their respective standard deviations of order 1 cm (Figure 9) are equivalent to changes in the barotropic streamfunction of a few Sverdrups ( $1 \text{ Sv} = 10^6 \text{ m}^3\text{s}^{-1}$ ) over the deep ocean (e.g., Gill and Niller, 1973). Larger differences of a few centimeters in many coastal regions also imply substantial changes in circulation. Our results indicate the importance of GRACE constraints in the ECCO optimizations for determining local  $p_b$  variations and associated circulations and extend previous findings by Köhl et al. (2012) and Saynisch et al. (2015), which were inherently limited by the shortness  
350 and relatively higher noise of the early GRACE data records. What is more, the novel GRACE constraint on global mean  $p_b$  described in this study helps correct freshwater flux errors in the MERRA-2 atmospheric reanalysis, leading to more realistic barystatic sea level estimates in ECCOv4r5 (section 4).

The remaining differences between ECCOv4r5 and GRACE point to potential issues with geophysical (non-oceanographic) signals present in GRACE data used in our study (section 5). Recent derivation of “corrections” for effects of earthquakes and GRD (Landerer and Wiese, 2025; Dahle et al., 2025; Bonin et al., 2026) and continued developments in GIA modeling (Whitehouse, 2018) shall prove crucial in improving the quality of GRACE data for  $p_b$  estimation. In addition to GRD, GIA and earthquakes, other geophysical signals of more speculative origin, having to do with deep gravity anomalies associated with core and mantle dynamics, may also play a role in the GRACE–ECCOv4r5 residuals (e.g., Gouranton et al., 2025, and  
360 references therein). Such signals are not well understood, however, and thus not ripe for forward modeling as with GRD and GIA.

From a broader geophysical perspective, insofar as ECCOv4r5 yields a valid estimate of  $p_b$  variability related to ocean dynamics, the GRACE–ECCOv4r5 fields can serve as a refined estimate of non-oceanographic gravity anomalies, which can then be studied in further detail (e.g., Gouranton et al., 2025). A more advanced possibility would involve the joint estimation  
365 of  $p_b$  and other geophysical parameters by bringing together models of the different components (solid Earth, hydrology, cryosphere, ocean) and other relevant datasets (e.g., laser altimetry of the ice sheets).

Estimation of “best”  $p_b$  fields can also benefit from developments on the modeling and estimation side. Some of our results suggest that GRACE errors used in ECCOv4r5 might have been both underestimated (e.g., in the regions of the large earthquakes) and overestimated (e.g., in the low and mid latitudes). Continuous refinement of GRACE data weights will be  
370 needed, as non-oceanographic signals and more generally data noise are removed in future data releases. More advanced data weighing involving non-diagonal covariance terms is also possible, although their estimation is challenging. On the modeling side, increased resolution should help with representation of bathymetric features such as continental slopes and connections to marginal seas (e.g., Bab el-Mandeb, Gibraltar, and Hudson Straits), which are important in modulating  $p_b$  variability in such regions. Shallow coastal domains (e.g., Arctic shelves) may also benefit from finer resolution as well as modified parameterizations of bottom friction (future optimizations could include bottom friction parameters as part of the “controls”). Note,  
375 however, that higher resolutions that allow realistic eddy fields will present other challenges in estimating large-scale  $p_b$  fields, particularly where non-negligible intrinsic  $p_b$  variability is expected (Zhao et al., 2021, 2023; Ponte et al., 2024).

Our analyses are based on the ECCO framework, with specific estimation methodology, model settings, and data products. Storto et al. (2024) highlight the substantial differences in  $p_b$  estimates produced by several available data assimilation systems,

380 none of which consider the use of GRACE constraints. Hopefully, this study can stimulate the inclusion of GRACE data in future ocean reanalysis and state estimation efforts and serve as a baseline for exploring the influence of such data on the behavior of  $p_b$  and associated circulation fields. The use of dedicated data withholding experiments (e.g., Köhl et al., 2012) would help to further quantify the impact of GRACE data constraints in  $p_b$  estimation. Such analyses are relatively easy to implement in an ECCO framework but can be computationally slow and expensive and are left for future study.

385 *Code and data availability.* Ocean bottom pressure data from the GRACE and GRACE-FO missions (Mascon Release RL06 v2) used in the analysis are publicly available at [https://podaac.jpl.nasa.gov/dataset/TELLUS\\_GRAC-GRFO\\_MASCON\\_CRI\\_GRID\\_RL06\\_V2](https://podaac.jpl.nasa.gov/dataset/TELLUS_GRAC-GRFO_MASCON_CRI_GRID_RL06_V2) from the NASA Physical Oceanography Distributed Active Archive Center (PO.DAAC). Monthly global ocean mass time series from GRACE and GRACE-FO JPL RL06.3Mv4 Mascon Solution is available at <https://sealevel.nasa.gov/understanding-sea-level/key-indicators/ocean-mass/>. GRACE and GRACE-FO monthly Gravitational Rotational Deformation (GRD) data are available at [https://podaac.jpl.nasa.gov/dataset/HOMAGE\\_GGFO\\_MSC\\_CRI\\_SALGRD\\_v01](https://podaac.jpl.nasa.gov/dataset/HOMAGE_GGFO_MSC_CRI_SALGRD_v01) from the NASA PO.DAAC. Ocean bottom pressure data from the ECCO Version 4 Release 5 (v4r5) and control simulations are available at [https://ecco.jpl.nasa.gov/drive/files/Version4/Release5/diags\\_monthly/OBP\\_mon\\_mean](https://ecco.jpl.nasa.gov/drive/files/Version4/Release5/diags_monthly/OBP_mon_mean) and [https://ecco.jpl.nasa.gov/drive/files/Version4/Release5/other/control\\_run/diags\\_monthly](https://ecco.jpl.nasa.gov/drive/files/Version4/Release5/other/control_run/diags_monthly), respectively. The code used to produce the figures in this study is openly available at [https://github.com/nishsilva/GRACE\\_ECCO](https://github.com/nishsilva/GRACE_ECCO).

*Author contributions.* RMP came up with concept and methodology for the study, with help from IF, and wrote the first draft. ENSS performed all calculations and figures, with help from MZ. OW and IF provided support on ECCO analyses. All authors participated in the writing of the final version of the manuscript.

*Competing interests.* All authors declare they have no competing interests.

*Acknowledgements.* This work was supported by grant 80NSSC24K1154 (NASA GRACE Follow-On Science Team) to AER. Part of this research was carried out at the Jet Propulsion Laboratory, California Institute of Technology, under a contract with the National Aeronautics and Space Administration (80NM0018D0004).

## References

- Androsov, A., Boebel, O., Schröter, J., Danilov, S., Macrander, A., and Ivanciu, I.: Ocean Bottom Pressure Variability: Can It Be Reliably Modeled?, *Journal of Geophysical Research: Oceans*, 125, e2019JC015469, <https://doi.org/https://doi.org/10.1029/2019JC015469>, e2019JC015469 10.1029/2019JC015469, 2020.
- 405 Bonin, J., Pie, N., Tamisiea, M. E., Chambers, D., and Save, H.: GRACE and GRACE-FO Mascons for Ocean Dynamic Applications, *Earth System Science Data Discussions*, pp. 1–34, <https://doi.org/10.5194/essd-2025-718>, 2026.
- Caron, L., Ivins, E. R., Larour, E., Adhikari, S., Nilsson, J., and Blewitt, G.: GIA Model Statistics for GRACE Hydrology, Cryosphere, and Ocean Science, *Geophysical Research Letters*, 45, 2203–2212, <https://doi.org/10.1002/2017GL076644>, 2018.
- Dahle, C., Boergens, E., Sasgen, I., Döhne, T., Reißland, S., Dobsław, H., Klemann, V., Murböck, M., König, R., Dill, R., Sips, M., Sylla, U., Groh, A., Horwath, M., and Flechtner, F.: GravIS: mass anomaly products from satellite gravimetry, *Earth System Science Data*, 17, 611–631, <https://doi.org/10.5194/essd-17-611-2025>, 2025.
- 410 Dawson, A.: eofs: A Library for EOF Analysis of Meteorological, Oceanographic, and Climate Data, *Journal of Open Research Software*, <https://doi.org/10.5334/jors.122>, 2016.
- Forget, G., Campin, J.-M., Heimbach, P., Hill, C. N., Ponte, R. M., and Wunsch, C.: ECCO version 4: an integrated framework for non-linear inverse modeling and global ocean state estimation, *Geoscientific Model Development*, 8, 3071–3104, <https://doi.org/10.5194/gmd-8-3071-2015>, 2015.
- 415 Fukumori, I., Fenty, I., Forget, G., Heimbach, P., King, C., Nguyen, A., Piecuch, C., Ponte, R., Quinn, K., Vinogradova, N., and Wang, O.: Data sets used in ECCO Version 4 Release 3., Tech. Rep., <http://hdl.handle.net/1721.1/120472>, 2018.
- Fukumori, I., Wang, O., Fenty, I., Forget, G., Heimbach, P., and Ponte, R. M.: ECCO version 4 release 4., Tech. Rep., <https://doi.org/10.5281/zenodo.3765929>, 2019.
- 420 Gelaro, R., McCarty, W., Suárez, M. J., Todling, R., Molod, A., Takacs, L., Randles, C. A., Darmenov, A., Bosilovich, M. G., Reichle, R., Wargan, K., Coy, L., Cullather, R., Draper, C., Akella, S., Buchard, V., Conaty, A., da Silva, A. M., Gu, W., Kim, G.-K., Koster, R., Lucchesi, R., Merkova, D., Nielsen, J. E., Partyka, G., Pawson, S., Putman, W., Rienecker, M., Schubert, S. D., Sienkiewicz, M., and Zhao, B.: The Modern-Era Retrospective Analysis for Research and Applications, Version 2 (MERRA-2), *Journal of Climate*, 30, 5419 – 5454, <https://doi.org/10.1175/JCLI-D-16-0758.1>, 2017.
- 425 Gill, A. and Niller, P.: The theory of the seasonal variability in the ocean, *Deep Sea Research and Oceanographic Abstracts*, 20, 141–177, [https://doi.org/https://doi.org/10.1016/0011-7471\(73\)90049-1](https://doi.org/https://doi.org/10.1016/0011-7471(73)90049-1), 1973.
- Gouranton, C. G., Panet, I., Greff-Lefftz, M., Manda, M., and Rosat, S.: GRACE Detection of Transient Mass Redistributions During a Mineral Phase Transition in the Deep Mantle, *Geophysical Research Letters*, 52, e2025GL116408, <https://doi.org/10.1029/2025GL116408>, 2025.
- 430 Greatbatch, R. J.: A note on the representation of steric sea level in models that conserve volume rather than mass, *Journal of Geophysical Research: Oceans*, 99, 12767–12771, <https://doi.org/https://doi.org/10.1029/94JC00847>, 1994.
- Gregory, J. M., Griffies, S. M., Hughes, C. W., Lowe, J. A., Church, J. A., et al.: Concepts and Terminology for sea Level: Mean, Variability and Change, Both Local and Global, *Surveys in Geophysics*, 40, 1251–1289, <https://doi.org/10.1007/s10712-019-09525-z>, 2019.
- 435 Hakuba, M. Z., Fourest, S., Boyer, T., Meyssignac, B., Carton, J. A., Forget, G., Cheng, L., Giglio, D., Johnson, G. C., Kato, S., Killick, R. E., Kolodziejczyk, N., Kuusela, M., Landerer, F., Llovel, W., Locarnini, R., Loeb, N., Lyman, J. M., Mishonov, A., Pilewskie, P., Reagan,

- J., Storto, A., Sukianto, T., and von Schuckmann, K.: Trends and Variability in Earth's Energy Imbalance and Ocean Heat Uptake Since 2005, *Surveys in Geophysics*, 45, 1721–1756, <https://doi.org/10.1007/s10712-024-09849-5>, 2024.
- 440 Han, S.-C., Riva, R., Sauber, J., and Okal, E.: Source parameter inversion for recent great earthquakes from a decade-long observation of global gravity fields, *Journal of Geophysical Research: Solid Earth*, 118, 1240–1267, <https://doi.org/10.1002/jgrb.50116>, 2013.
- Hughes, C. W., Stepanov, V. N., Fu, L.-L., Barnier, B., and Hargreaves, G. W.: Three forms of variability in Argentine Basin ocean bottom pressure, 2007.
- Köhl, A., Siegmund, F., and Stammer, D.: Impact of assimilating bottom pressure anomalies from GRACE on ocean circulation estimates, *Journal of Geophysical Research: Oceans*, 117, <https://doi.org/10.1029/2011JC007623>, 2012.
- 445 Landerer, F. and Wiese, D.: GRACE/GRACE-FO Level-4 Monthly Gravitational-Rotational-Deformation version 01 from NASA MEASURES HOMaGE, <https://doi.org/10.5067/HMOGD-4JM01>, 2025.
- Landerer, F. W., Wiese, D. N., Bentel, K., Boening, C., and Watkins, M. M.: North Atlantic meridional overturning circulation variations from GRACE ocean bottom pressure anomalies, *Geophysical Research Letters*, 42, 8114–8121, <https://doi.org/10.1002/2015GL065730>, 2015.
- 450 Landerer, F. W., Flechtner, F. M., Save, H., Webb, F. H., Bandikova, T., Bertiger, W. I., Bettadpur, S. V., Byun, S. H., Dahle, C., Dobslaw, H., Fahnestock, E., Harvey, N., Kang, Z., Kruizinga, G. L. H., Loomis, B. D., McCullough, C., Murböck, M., Nagel, P., Paik, M., Pie, N., Poole, S., Strelakov, D., Tamisiea, M. E., Wang, F., Watkins, M. M., Wen, H.-Y., Wiese, D. N., and Yuan, D.-N.: Extending the Global Mass Change Data Record: GRACE Follow-On Instrument and Science Data Performance, *Geophysical Research Letters*, 47, e2020GL088306, <https://doi.org/10.1029/2020GL088306>, 2020.
- 455 Makowski, J. K., Chambers, D. P., and Bonin, J. A.: Using ocean bottom pressure from the gravity recovery and climate experiment (GRACE) to estimate transport variability in the southern Indian Ocean, *Journal of Geophysical Research: Oceans*, 120, 4245–4259, <https://doi.org/10.1002/2014JC010575>, 2015.
- Na, H., Watts, D. R., Park, J.-H., Jeon, C., Lee, H. J., Nonaka, M., and Greene, A. D.: Bottom pressure variability in the Kuroshio Extension driven by the atmosphere and ocean instabilities, *Journal of Geophysical Research: Oceans*, 121, 6507–6519, <https://doi.org/https://doi.org/10.1002/2016JC012097>, 2016.
- 460 Nakayama, Y., Malyarenko, A., Zhang, H., Wang, O., Auger, M., Nie, Y., Fenty, I., Mazloff, M., Köhl, A., and Menemenlis, D.: Evaluation of MITgcm-based ocean reanalyses for the Southern Ocean, *Geoscientific Model Development*, 17, 8613–8638, <https://doi.org/10.5194/gmd-17-8613-2024>, 2024.
- Nilsson, J., Gardner, A. S., and Paolo, F. S.: Elevation change of the Antarctic Ice Sheet: 1985 to 2020, *Earth System Science Data*, 14, 3573–3598, <https://doi.org/10.5194/essd-14-3573-2022>, 2022.
- 465 Ponte, R. M.: A preliminary model study of the large-scale seasonal cycle in bottom pressure over the global ocean, *Journal of Geophysical Research: Oceans*, 104, 1289–1300, <https://doi.org/10.1029/1998JC900028>, 1999.
- Ponte, R. M. and Schindelegger, M.: Seasonal Cycle in Sea Level Across the Coastal Zone, *Earth and Space Science*, 11, e2024EA003978, <https://doi.org/10.1029/2024EA003978>, e2024EA003978 2024EA003978, 2024.
- 470 Ponte, R. M., Zhao, M., and Schindelegger, M.: How well do we know the seasonal cycle in ocean bottom pressure?, *Earth and Space Science*, 11, e2024EA003661, <https://doi.org/10.1029/2024EA003661>, 2024.
- Quinn, K. J. and Ponte, R. M.: Estimating weights for the use of time-dependent gravity recovery and climate experiment data in constraining ocean models, *Journal of Geophysical Research: Oceans*, 113, <https://doi.org/10.1029/2008JC004903>, 2008.

- Rignot, E., Jacobs, S., Mouginot, J., and Scheuchl, B.: Ice-Shelf Melting Around Antarctica, *Science*, 341, 266–270, 475 <https://doi.org/10.1126/science.1235798>, 2013.
- Saynisch, J., Bergmann-Wolf, I., and Thomas, M.: Assimilation of GRACE-derived oceanic mass distributions with a global ocean circulation model, *Journal of Geodesy*, 89, 121–139, <https://doi.org/10.1007/s00190-014-0766-0>, 2015.
- Simon, K. M. and Riva, R. E. M.: Uncertainty Estimation in Regional Models of Long-Term GIA Uplift and Sea Level Change: An Overview, *Journal of Geophysical Research: Solid Earth*, 125, e2019JB018983, <https://doi.org/10.1029/2019JB018983>, 2020.
- 480 Stammer, D. and Cazenave, A., eds.: Applications of satellite altimetry over oceans and land surfaces, p. 643, CRC Press, 2017.
- Storto, A., Chierici, G., Pfeffer, J., Barnoud, A., Bourdalle-Badie, R., Blazquez, A., Cavaliere, D., Lalau, N., Coupry, B., Drevillon, M., Fourest, S., Larnicol, G., and Yang, C.: Variability in manometric sea level from reanalyses and observation-based products over the Arctic and North Atlantic oceans and the Mediterranean Sea, *State of the Planet*, 4-osr8, 12, <https://doi.org/10.5194/sp-4-osr8-12-2024>, 2024.
- 485 Swenson, S. and Wahr, J.: Post-processing removal of correlated errors in GRACE data, *Geophysical Research Letters*, 33, <https://doi.org/10.1029/2005GL025285>, 2006.
- Tapley, B. D., Bettadpur, S., Watkins, M., and Reigber, C.: The gravity recovery and climate experiment: Mission overview and early results, *Geophysical Research Letters*, 31, <https://doi.org/10.1029/2004GL019920>, 2004.
- Vinogradova, N. T., Ponte, R. M., Tamisiea, M. E., Quinn, K. J., Hill, E. M., and Davis, J. L.: Self-attraction and loading effects on ocean mass 490 redistribution at monthly and longer time scales, *Journal of Geophysical Research: Oceans*, 116, <https://doi.org/10.1029/2011JC007037>, 2011.
- Watkins, M. M., Wiese, D. N., Yuan, D.-N., Boening, C., and Landerer, F. W.: Improved Methods for Observing Earth’s Time Variable Mass Distribution with GRACE Using Spherical Cap Mascons: Improved Gravity Observations from GRACE, *J. Geophys. Res.: Solid Earth*, 120, 2648–2671, <https://doi.org/10.1002/2014JB011547>, 2015.
- 495 WCRP Global Sea Level Budget Group: Global sea-level budget 1993–present, *Earth System Science Data*, 10, 1551–1590, <https://doi.org/10.5194/essd-10-1551-2018>, 2018.
- Whitehouse, P. L.: Glacial isostatic adjustment modelling: historical perspectives, recent advances, and future directions, *Earth Surface Dynamics*, 6, 401–429, <https://doi.org/10.5194/esurf-6-401-2018>, 2018.
- Wiese, D. N., Yuan, D.-N., Boening, C., Landerer, F. W., and Watkins, M. M.: JPL GRACE and GRACE-FO Mascon Ocean, Ice, and Hydrology Equivalent Water Height Coastal Resolution Improvement (CRI) Filtered Release 06 Version 02, <https://doi.org/10.5067/TEMSC-3JC62>, 2019.
- 500 Wiese, D. N., Yuan, D.-N., Boening, C., Landerer, F. W., and Watkins, M. M.: JPL GRACE and GRACE-FO Mascon Ocean, Ice, and Hydrology Equivalent Water Height CRI Filtered RL06.3Mv04, <https://doi.org/10.5067/TEMSC-3JC634>, 2024.
- Wunsch, C., Heimbach, P., Ponte, R. M., Fukumori, I., and Members, T. E.-G. C.: The Global General Circulation of the Ocean Estimated 505 by the ECCO-Consortium, *Oceanography*, 22(2), <https://doi.org/10.5670/oceanog.2009.41>, 2009.
- Zhao, M., Ponte, R. M., Penduff, T., Close, S., Llovel, W., and Molines, J.-M.: Imprints of Ocean Chaotic Intrinsic Variability on Bottom Pressure and Implications for Data and Model Analyses, *Geophysical Research Letters*, 48, e2021GL096341, <https://doi.org/10.1029/2021GL096341>, 2021.
- Zhao, M., Ponte, R. M., and Penduff, T.: Global-scale random bottom pressure fluctuations from oceanic intrinsic variability, *Science Advances*, 9, eadg0278, <https://doi.org/10.1126/sciadv.adg0278>, 2023.
- 510
